# Supplementary material for: Reductive inactivation of the hemiaminal pharmacophore for resistance against tetrahydroisoquinoline antibiotics
Source: PubMed Central journal article supplement (PMC8648761; doi:10.1038/s41467-021-27404-3), 2021-12-06
Supplement: 41467_2021_27404_MOESM1_ESM.pdf [file 41467_2021_27404_MOESM1_ESM.pdf]

Supplementary Information

**Reductive inactivation of the hemiaminal pharmacophore for resistance against tetrahydroisoquinoline antibiotics**

Wan-Hong Wen<sup>1</sup>, Yue Zhang<sup>1</sup>, Ying-Ying Zhang<sup>1</sup>, Qian Yu<sup>2</sup>, Chu-Chu Jiang<sup>2</sup>, Man-Cheng Tang<sup>1</sup>, Jin-Yue Pu<sup>1</sup>, Lian Wu<sup>1</sup>, Yi-Lei Zhao<sup>2</sup>, Ting Shi<sup>2\*</sup>, Jiahai Zhou<sup>3\*</sup>, and Gong-Li Tang<sup>1,4\*</sup>

<sup>1</sup>State Key Laboratory of Bio-organic and Natural Products Chemistry, Center for Excellence in Molecular Synthesis, Shanghai Institute of Organic Chemistry, University of Chinese Academy of Sciences, Chinese Academy of Sciences, 345 Lingling Road, Shanghai 200032, China

<sup>2</sup>State Key Laboratory of Microbial Metabolism, Joint International Research Laboratory of Metabolic and Developmental Sciences, School of Life Sciences and Biotechnology, Shanghai Jiao Tong University, Shanghai 200240, China.

<sup>3</sup>CAS Key Laboratory of Quantitative Engineering Biology, Shenzhen Institute of Synthetic Biology, Shenzhen Institute of Advanced Technology, Chinese Academy of Sciences, Shenzhen 518055, China.

<sup>4</sup>School of Chemistry and Material Sciences, Hangzhou Institute for Advanced Study, University of Chinese Academy of Sciences, 1 Sub-lane Xiangshan, Hangzhou 310024, China

\*Correspondence: Gong-Li Tang, Email: [gltang@sioc.ac.cn](mailto:gltang@sioc.ac.cn)

Jiahai Zhou, Email: [jjahai@siat.ac.cn](mailto:jjahai@siat.ac.cn)

Ting Shi, Email: [tshi@sjtu.edu.cn](mailto:tshi@sjtu.edu.cn)

## Contents

|                                                                                                                                                                                                                           |    |
|---------------------------------------------------------------------------------------------------------------------------------------------------------------------------------------------------------------------------|----|
| <b>Supplementary Tables</b> .....                                                                                                                                                                                         | 4  |
| <b>Supplementary Table 1.</b> Strains and plasmids used in this study. ....                                                                                                                                               | 4  |
| <b>Supplementary Table 2.</b> List of PCR primers used in this study. ....                                                                                                                                                | 6  |
| <b>Supplementary Table 3.</b> Statistics of X-ray crystallographic data collection and model refinements. ....                                                                                                            | 7  |
| <b>Supplementary Table 4.</b> NMR spectroscopic data for <b>18</b> . ....                                                                                                                                                 | 8  |
| <b>Supplementary Table 5.</b> NMR spectroscopic data for <b>19</b> . ....                                                                                                                                                 | 9  |
| <b>Supplementary Table 6.</b> Information of homologous proteins selected by blastP in this study. ....                                                                                                                   | 10 |
| <b>Supplementary Figures</b> .....                                                                                                                                                                                        | 11 |
| <b>Supplementary Figure 1.</b> Construction and verification of <i>napW</i> gene-knockout mutant ( $\Delta napW$ , TG3022) of <i>S. lusitanus</i> NRRL 8034. ....                                                         | 11 |
| <b>Supplementary Figure 2.</b> Construction and verification of <i>homW</i> ( $\Delta homW$ , TG3023) and dual-gene ( $\Delta napW \& \Delta homW$ , TG3024) gene-knockout mutants of <i>S. lusitanus</i> NRRL 8034. .... | 11 |
| <b>Supplementary Figure 3.</b> Overproduction in <i>E. coli</i> and purification of two enzymes utilized in this study. ....                                                                                              | 12 |
| <b>Supplementary Figure 4.</b> Cartoon representation of chain A of NapW structure. ....                                                                                                                                  | 12 |
| <b>Supplementary Figure 5.</b> Overlapping for structures of NapW-NADPH complex and NapW. ....                                                                                                                            | 13 |
| <b>Supplementary Figure 6.</b> Overproduction in <i>E. coli</i> and purification of NapW and mutants utilized in this study. ....                                                                                         | 13 |
| <b>Supplementary Figure 7.</b> Catalytic activity of the NapW mutants to NDM detected by HPLC. ....                                                                                                                       | 14 |
| <b>Supplementary Figure 8.</b> The potential energy surface obtained from umbrella sampling. ....                                                                                                                         | 14 |
| <b>Supplementary Figure 9.</b> The RMSD values of MD simulations in WT and D165A mutant systems. ....                                                                                                                     | 15 |
| <b>Supplementary Figure 10.</b> The RMSF values of MD simulations in WT and D165A mutant. ....                                                                                                                            | 15 |
| <b>Supplementary Figure 11.</b> The probability of water number within 3.4 Å of O3 atom of NDM in MD simulations. ....                                                                                                    | 16 |

|                                                                                                                                           |    |
|-------------------------------------------------------------------------------------------------------------------------------------------|----|
| <b>Supplementary Figure 12.</b> Analysis of NapW/BmGDH cascade reaction. ....                                                             | 17 |
| <b>Supplementary Figure 13.</b> NOEs (indicated by red arrows) determined the stereochemistry of compound <b>2</b> . ....                 | 18 |
| <b>Supplementary Figure 14.</b> Overproduction in <i>E. coli</i> and purification of SfmO1, homO1a and homO1b utilized in this study..... | 19 |
| <b>Supplementary Figure 15.</b> HR-MS/MS analysis of <b>16</b> .....                                                                      | 20 |
| <b>Supplementary Figure 16.</b> HR-MS/MS analysis of <b>17</b> . ....                                                                     | 21 |
| <b>Supplementary Figure 17.</b> HR-MS/MS analysis of ET-745 ( <b>8</b> ).....                                                             | 22 |
| <b>Supplementary Figure 18.</b> Structure characterization data of <b>18</b> .....                                                        | 26 |
| <b>Supplementary Figure 19.</b> Structure characterization data of <b>19</b> .....                                                        | 30 |
| <b>Supplementary Figure 20.</b> Fermentation analysis of LMM producing strain, <i>S. candidus</i> LL-AP191.....                           | 31 |
| <b>Supplementary Figure 21.</b> Sequence similarity network (SSN) analysis of NapW-homologues. ....                                       | 31 |
| <b>Supplementary Figure 22.</b> Overproduction in <i>E. coli</i> and purification of SDR utilized in this study .....                     | 32 |
| <b>Supplementary Figure 23.</b> Enzymatic assays of NapW and homologous proteins towards <b>1</b> were detected by HPLC analysis.....     | 33 |
| <b>Supplementary Figure 24.</b> Enzymatic assays of NapW and homologous proteins towards <b>16</b> were detected by HPLC-MS. ....         | 34 |
| <b>Supplementary Figure 25.</b> Enzymatic assays of NapW and homologous proteins towards <b>7</b> were detected by HPLC analysis.....     | 35 |
| <b>Supplementary Figure 26.</b> Enzymatic assays of NapW and homologous proteins towards <b>18</b> were detected by HPLC analysis.....    | 36 |
| <b>Supplementary References</b> .....                                                                                                     | 37 |

## Supplementary Tables

**Supplementary Table 1. Strains and plasmids used in this study.**

| <b>Strains</b>                          | <b>Characteristics</b>                                                                   | <b>References</b> |
|-----------------------------------------|------------------------------------------------------------------------------------------|-------------------|
| <i>E. coli</i> DH5 $\alpha$             | Host for general cloning                                                                 | Invitrogen        |
| <i>E. coli</i> BL21 (DE3)               | Host for protein expression                                                              | Invitrogen        |
| <i>E. coli</i> Rosetta (DE3)            | Host for protein expression                                                              | Novagen           |
| <i>E. coli</i> S17-1                    | Donor strain for conjugation between <i>E. coli</i> and <i>S. lusitanus</i> NRRL 8034    | 4                 |
| <i>S. lusitanus</i> NRRL 8034           | Wild type, NDM producing strain                                                          | NRRL              |
| <i>S. lavendulae</i> NRRL 11002         | Wild type, SFM producing strain                                                          | NRRL              |
| <i>S. candidus</i> LL-AP191 (NRRL 3110) | Wild type, LMM producing strain                                                          | NRRL              |
| <i>S. lusitanus</i> TG3022              | $\Delta napW$ gene knockout mutant                                                       | This work         |
| <i>S. lusitanus</i> TG3023              | $\Delta homW$ gene knockout mutant                                                       | This work         |
| <i>S. lusitanus</i> TG3024              | $\Delta napW$ & $homW$ gene knockout mutant                                              | This work         |
| <b>Plasmids</b>                         |                                                                                          |                   |
| pMD19-T                                 | $Ap^R$ , <i>E. coli</i> subcloning vector                                                | Takara            |
| pKC1139                                 | $Am^R$ , <i>E. coli</i> - <i>Streptomyces</i> shuttle vector for gene inactivation       | 4                 |
| pET28a                                  | $Km^R$ , Protein expression in <i>E. coli</i>                                            | Invitrogen        |
| pET37b                                  | $Km^R$ , Protein expression in <i>E. coli</i>                                            | Invitrogen        |
| pRSF-BmGDH                              | Expression vector for D-Glucose dehydrogenase from <i>Bacillus megaterium</i> (BmGDH)    | 5                 |
| pTG3032                                 | pKC1139 derivative for gene inactivation of <i>napW</i>                                  | This work         |
| pTG3046                                 | pKC1139 derivative for gene inactivation of <i>homW</i>                                  | This work         |
| pTG3044                                 | pET37b derivative containing gene <i>napW</i> for protein expression in <i>E. coli</i>   | This work         |
| pTG3045                                 | pET28a derivative containing gene <i>napW</i> for protein expression in <i>E. coli</i>   | This work         |
| pTG3047                                 | pET28a derivative containing gene <i>sfmO1</i> for protein expression in <i>E. coli</i>  | This work         |
| pTG3048                                 | pET37b derivative containing gene <i>homO1a</i> for protein expression in <i>E. coli</i> | This work         |

|         |                                                                                          |           |
|---------|------------------------------------------------------------------------------------------|-----------|
| pTG3049 | pET37b derivative containing gene <i>homO1b</i> for protein expression in <i>E. coli</i> | This work |
| pTG3050 | pET37b derivative containing gene <i>slvW1</i> for protein expression in <i>E. coli</i>  | This work |
| pTG3051 | pET37b derivative containing gene <i>slvW2</i> for protein expression in <i>E. coli</i>  | This work |
| pTG3052 | pET37b derivative containing gene SDR-Pb for protein expression in <i>E. coli</i>        | This work |
| pTG3053 | pET37b derivative containing gene SDR-Cc for protein expression in <i>E. coli</i>        | This work |
| pTG3054 | pET37b derivative containing gene SDR-Rm for protein expression in <i>E. coli</i>        | This work |
| pTG3055 | pET37b derivative containing gene SDR-Mb for protein expression in <i>E. coli</i>        | This work |
| pTG3056 | pET37b derivative containing gene SDR-Li for protein expression in <i>E. coli</i>        | This work |
| pTG3057 | pET37b derivative containing gene SDR-Cs for protein expression in <i>E. coli</i>        | This work |
| pTG3058 | pET37b derivative containing gene SDR-Ss for protein expression in <i>E. coli</i>        | This work |
| pTG3059 | pET37b derivative containing mutated <i>napW</i> (E113A) gene for protein expression     | This work |
| pTG3060 | pET37b derivative containing mutated <i>napW</i> (W213A) gene for protein expression     | This work |
| pTG3061 | pET37b derivative containing mutated <i>napW</i> (R176A) gene for protein expression     | This work |
| pTG3062 | pET37b derivative containing mutated <i>napW</i> (D165A) gene for protein expression     | This work |
| pTG3063 | pET37b derivative containing mutated <i>napW</i> (N177A) gene for protein expression     | This work |

Abbreviations: *Ap<sup>R</sup>*, ampicillin resistance; *Am<sup>R</sup>*, apramycin resistance; *Km<sup>R</sup>*, kanamycin resistance.

**Supplementary Table 2.** List of PCR primers used in this study.

| Primers             | Sequences                                             | Application            |
|---------------------|-------------------------------------------------------|------------------------|
| <i>napW</i> -L-for  | GAATTCTCTGATGGCCGGTGTCTCCAAG                          | Gene knockout          |
| <i>napW</i> -L-rev  | TCTAGACAGCTCGCTCAGGAGTACGG                            |                        |
| <i>napW</i> -R-for  | TCTAGACGTCTCGGACCGGTTGTACTC                           |                        |
| <i>napW</i> -R-rev  | AAGCTTCCGAGTACGACGAGGAACACGTG                         |                        |
| <i>napW</i> -gt-for | GAACAGCGCGGTCACCGATACC                                | Genotype validation    |
| <i>napW</i> -gt-rev | CGACTGGACGAGTACTGCACACCGT                             |                        |
| <i>homW</i> -L-for  | GAATTCTACTCCTCGCGCTGTTTCGACGCTG                       | Gene knockout          |
| <i>homW</i> -L-rev  | TCTAGAGACGTCACCGGCTACCGCTGAC                          |                        |
| <i>homW</i> -R-for  | TCTAGACGGCTGTGTCAATCACGGCCTCC                         |                        |
| <i>homW</i> -R-rev  | AAGCTTCGACGAAGGAGTCAGCAGCATGG                         |                        |
| <i>homW</i> -gt-for | CAGGACGTCCAGCGAGCCGAAGG                               | Genotype validation    |
| <i>homW</i> -gt-rev | GAAGCGCCCGCGGTCACTGAGG                                |                        |
| homW-for            | CATATGACACAGCCGTTGCGGGACAAGG                          | Protein expression     |
| homW-rev            | AAGCTTGCGGTAGCCGGTGACGTCGGCCG<br>GGCGGCCCGCGTCCTGC    |                        |
| SlvW1-for           | CATATGACAGGGTCATCGAAAGGTCCGC                          | Protein expression     |
| SlvW1-rev           | AAGCTTGCGATACCCCGTGACGTCG                             |                        |
| SlvW2-for           | CATATGGATGACATGAGCAACGAGGACA                          | Protein expression     |
| SlvW2-rev           | AAGCTTGCGGTAGTCGTCAGGGGAGGC                           |                        |
| NapW-E113A-for      | GGGAGGTGCCCGACTGTTTCGAGTTCGACA<br>A                   | Site-directed mutation |
| NapW-E113A-rev      | ACAGTCCGGGCACCTCCCCAGACGTCGTTGA                       |                        |
| NapW-D165A-for      | GATGACCGCGGGGACGGCCGCTACAACG<br>G                     | Site-directed mutation |
| NapW-D165A-rev      | CCGTCCCCGCGGTCATCTCCACCACGAGTC                        |                        |
| NapW-R176A-for      | CCACTACGCGAACTCGTACTTCTACGACCT                        | Site-directed mutation |
| NapW- R176A -rev    | ACGAGTTCGCGTAGTGGCTGCCGTTGTACG                        |                        |
| NapW- N177A-for     | CTACCGCGGTCGTA CT TCTACGACCTGGT                       | Site-directed mutation |
| NapW- N177A-rev     | AGTACGACGCGCGGTAGTGGCTGCCGTTGT                        |                        |
| NapW-W213A-for      | CGGTGACGCTCACGCCGGGCGGATGCGTT<br>CGGAGATGATGCT        | Site-directed mutation |
| NapW-W213A -rev     | AGCATCATCTCCGAACGCATCGCGCCCGGC<br>GTGAGCGTCACCG       |                        |
| HomO1a-for          | TTAAGAAGGAGATATACATATGGTGACGG<br>GAACTGTCACCTTTG      | Site-directed mutation |
| HomO1a-rev          | TCGAGTGCGGCCGCAAGCTTGCGGTAGTCG<br>TCCGGCGAGGCGTC      |                        |
| HomO1b-for          | TTAAGAAGGAGATATACATATGACGTGGTC<br>GCCCGATCC           | Site-directed mutation |
| HomO1b-rev          | TCGAGTGCGGCCGCAAGCTTGCGGTGCGTC<br>CAGCCGTCCGGCCGGTTCC |                        |
| SfmO1-for           | ATATGAATTCCATATGACCGACGGCGTCCGC<br>AC                 | Protein expression     |
| HomO1-rev           | ATATAAGCTTTTACTCGAGCAAGGGGTAC<br>CCAGCGGTC-           |                        |

**Supplementary Table 3.** Statistics of X-ray crystallographic data collection and model refinements.

|                                             | <b>NapW</b>               | <b>NapW-NADPH complex</b> |
|---------------------------------------------|---------------------------|---------------------------|
| <b>Data collection</b>                      |                           |                           |
| Wavelength (Å)                              | 0.97853                   | 0.97918                   |
| Space group                                 | <i>P2</i>                 | <i>P2</i> <sub>1</sub>    |
| Cell dimension                              |                           |                           |
| a, b, c (Å)                                 | 117.149, 134.438, 117.216 | 116.42, 116.04, 134.76    |
| $\alpha$ , $\beta$ , $\gamma$ (°)           | 90.000, 90.041, 90.000    | 90.00, 90.04, 90.00       |
| Resolution (Å)                              | 50.00-2.08 (2.12-2.08)    | 58.27-2.00 (2.05-2.00)    |
| R <sub>merge</sub> (%)                      | 14.2 (99.7)               | 8.2 (84.6)                |
| R <sub>meas</sub> (%)                       | 15.4 (107.7)              | 8.9 (92.0)                |
| I/ $\sigma$ (I)                             | 10.778 (2.200)            | 12.9 (2.4)                |
| Completeness (%)                            | 100.0 (100.0)             | 99.0 (99.4)               |
| Redundancy                                  | 6.9 (7.0)                 | 6.8 (6.6)                 |
| Unique reflections                          | 216044                    | 238915                    |
| CC <sub>1/2</sub>                           | 0.990 (0.725)             | 0.999 (0.836)             |
| <b>Structure refinement</b>                 |                           |                           |
| Resolution (Å)                              | 41.332 - 2.083            | 58.269 - 2.000            |
| No. reflections                             | 213192                    | 238769                    |
| R <sub>work</sub> /R <sub>free</sub> (%)    | 21.02/24.91               | 17.75/20.17               |
| No. atoms                                   | 18962                     | 21109                     |
| Protein                                     | 17583                     | 18693                     |
| Ligand                                      |                           | 768                       |
| Water                                       | 1379                      | 1648                      |
| Root mean square deviations                 |                           |                           |
| bonds (Å)                                   | 0.0092                    | 0.007                     |
| angles (Å)                                  | 0.93                      | 1.16                      |
| B factor, overall (Å <sup>2</sup> )         | 22.2                      | 35.8                      |
| B factor, protein atoms (Å <sup>2</sup> )   | 21.8                      | 35.0                      |
| B factor, Ligand (Å <sup>2</sup> )          |                           | 35.4                      |
| B factor, water molecules (Å <sup>2</sup> ) | 27.3                      | 45.6                      |
| Ramachandran plot (%)                       |                           |                           |
| Favored (%)                                 | 98.27                     | 97.55                     |
| Allowed (%)                                 | 1.73                      | 2.45                      |
| Outliers (%)                                | 0.00                      | 0.00                      |
| PDB code                                    | 7BTM                      | 7BSX                      |

**Supplementary Table 4.** NMR spectroscopic data for **18**.

| Position | $\delta\text{C}$ , type | $\delta\text{H}$ (mult., $J$ in Hz)           |
|----------|-------------------------|-----------------------------------------------|
| 1        | 51.67, CH               | 4.27 (br s, 1H)                               |
| 3        | 49.88, CH               | 3.34 (m, 1H, 9.0)                             |
| 4        | 23.80, CH <sub>2</sub>  | 2.73 (dd, 1H, 2.3, 17.2)<br>2.13 (m, 1H)      |
| 5        | 187.56, C               |                                               |
| 6        | 130.68, C               |                                               |
| 6-M      | 8.30, CH <sub>3</sub>   | 1.94 (s, 3H)                                  |
| 7        | 155.49, C               |                                               |
| 7-OM     | 61.39, CH <sub>3</sub>  | 3.88 (s, 3H, overlap)                         |
| 8        | 181.91, C               |                                               |
| 9        | 137.79, C               |                                               |
| 10       | 141.99, C               |                                               |
| 11       | 61.25, CH               | 3.88(m, 1H, overlap)                          |
| 13       | 60.69, CH               | 4.04 (dd, 1H, 3.0, 6.7)                       |
| 14       | 27.40, CH <sub>2</sub>  | 2.17 (m, 1H)<br>1.70 (m, 1H)                  |
| 15       | 36.04, CH               | 2.65 (m, 1H)                                  |
| 16       | 62.71, CH <sub>2</sub>  | 3.62 (m, 1H, overlap)<br>3.55 (dd, 1H, 3.7)   |
| 17       | 78.60, CH               | 4.86 (d, 1H, 3.2)                             |
| 18       | 68.62, CH <sub>2</sub>  | 3.75 (dd, 1H, 2.6)<br>3.65 (m, 1H, overlap)   |
| 1'       | 97.06, CH               | 5.05 (d, 1H, 4.6)                             |
| 2'       | 37.86, CH <sub>2</sub>  | 2.02(dd, 1H, 4.8, 14.9)<br>1.88 (d, 1H, 14.8) |
| 3'       | 66.97, C                |                                               |
| 3'-M     | 28.60, CH <sub>3</sub>  | 1.29 (s, 3H)                                  |
| 4'       | 69.91, CH               | 3.14 (br s, 1H)                               |
| 4'-NM    | 46.99, CH <sub>3</sub>  | 3.03 (s, 3H)                                  |
| 4'-NM    | 41.68, CH <sub>3</sub>  | 3.03 (s, 3H)                                  |
| 5'       | 62.16, CH               | 3.95(dd, 1H, 1.8, 7.3)                        |
| 6'       | 17.19, CH <sub>3</sub>  | 1.44 (d, 3H, 7.2)                             |

In D<sub>2</sub>O, 500 MHz for <sup>1</sup>H and 125 MHz for <sup>13</sup>C NMR; chemical shifts are reported in ppm. All signals are determined by <sup>1</sup>H -<sup>1</sup>H COSY, HSQC and HMBC correlation.



**Supplementary Table 5.** NMR spectroscopic data for **19**.

| Position | $\delta$ C, type       | $\delta$ H (multi., <i>J</i> in Hz)             |
|----------|------------------------|-------------------------------------------------|
| 1        | 56.06, CH              | 4.08 (br s, 1H)                                 |
| 3        | 55.62, CH              | 2.91 (d, 1H, 10.5)                              |
| 4        | 24.88, CH <sub>2</sub> | 2.67 (m, 1H, overlap)<br>2.14 (m, 1H)           |
| 5        | 186.00, C              |                                                 |
| 6        | 128.66, C              |                                                 |
| 6-M      | 8.75, CH <sub>3</sub>  | 1.94 (s, 3H, overlap)                           |
| 7        | 155.66, C              |                                                 |
| 7-OM     | 61.03, CH <sub>3</sub> | 3.97 (s, 3H, overlap)                           |
| 8        | 181.48, C              |                                                 |
| 9        | 137.88, C              |                                                 |
| 10       | 140.80, C              |                                                 |
| 11       | 58.38, CH              | 3.66 (m, 1H)                                    |
| 13       | 61.83, CH              | 3.86 (br s, 1H)                                 |
| 14       | 30.67, CH <sub>2</sub> | 2.06 (m, 1H, overlap)<br>1.95 (m, 1H, overlap)  |
| 15       | 37.91, CH              | 2.54 (m, 1H)                                    |
| 16       | 63.94, CH <sub>2</sub> | 3.66 (m, 1H, overlap)<br>3.61 (m, 1H)           |
| 17       | 54.27, CH <sub>2</sub> | 3.09 (d, 1H, 11.0)<br>2.87 (d, 1H, 11.6)        |
| 18       | 68.16, CH <sub>2</sub> | 3.79 (dd, 1H, 3.4, 10.4)<br>3.54 (dd, 1H, 10.3) |
| 1'       | 98.34, CH              | 4.89 (d, 1H, 4.6)                               |
| 2'       | 41.01, CH <sub>2</sub> | 1.83 (dd, 1H, 4.7, 14.2)<br>1.72 (d, 1H, 14.2)  |
| 3'       | 65.99, C               |                                                 |
| 3'-M     | 29.01, CH <sub>3</sub> | 1.18 (s, 3H)                                    |
| 4'       | 69.21, CH              | 2.06 (br s, 1H, overlap)                        |
| 4'-NM    | 44.72, CH <sub>3</sub> | 2.65 (s, 6H, overlap)                           |
| 5'       | 65.35, CH              | 3.96 (m, 1H, overlap)                           |
| 6'       | 18.87, CH <sub>3</sub> | 1.31 (d, 3H, 7.0)                               |

In CDCl<sub>3</sub>, 600 MHz for <sup>1</sup>H and 150 MHz for <sup>13</sup>C NMR and DEPT135; chemical shifts are reported in ppm. All signals are determined by <sup>1</sup>H -<sup>1</sup>H COSY, HSQC and HMBC correlation.

**Supplementary Table 6.** Information of homologous proteins selected by blastP in this study.

| <b>Name</b> | <b>Accession</b> | <b>Origin</b>                       | <b>Identity</b> |
|-------------|------------------|-------------------------------------|-----------------|
| NapW        | WP_121719702.1   | <i>S. lusitanus</i> NRRL 8034       | 100%            |
| homW        | MT230905         | <i>S. lusitanus</i> NRRL 8034       | 76%             |
| SfmO1       | ABI22118.1       | <i>S. lavendulae</i> NRRL11002      | 56%             |
| homO1a      | MT230906         | <i>S. lavendulae</i> NRRL11002      | 62%             |
| homO1b      | MT230907         | <i>S. lavendulae</i> NRRL11002      | 60%             |
| SlvW1       | WP_003978122.1   | <i>S. lividans</i> 1326             | 74%             |
| SlvW2       | EOY50906.1       | <i>S. lividans</i> 1326             | 61%             |
| SDR-Pb      | WP_076164526.1   | <i>Paenibacillus</i>                | 75%             |
| SDR-Cc      | WP_099700661.1   | <i>Chroococcales cyanobacterium</i> | 67%             |
| SDR-Rm      | WP_028745990.1   | <i>Rhizobium mesoamericanum</i>     | 65%             |
| SDR-Mb      | OJY30843.1       | Myxococcales bacterium              | 53%             |
| SDR-Li      | WP_002092909.1   | <i>Leptospira interrogans</i>       | 49%             |
| SDR-Cs      | PRW56829.1       | <i>Chlorella sorokiniana</i>        | 44%             |
| SDR-Ss      | WP_094604007.1   | <i>Sporomusa silvacetica</i>        | 34%             |

## Supplementary Figures

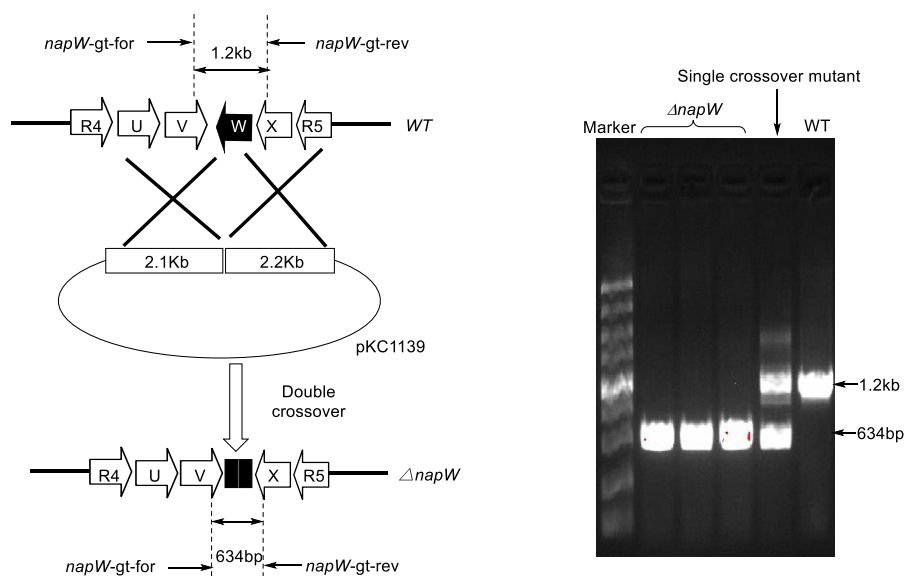

**Supplementary Figure 1.** Construction and verification of *napW* gene-knockout mutant ( $\Delta napW$ , TG3022) of *S. lusitanus* NRRL 8034. **a**, Double crossover process. **b**, Genotyping validation of three  $\Delta napW$  mutant clones. One single crossover mutant clone and wild type (WT) were performed as negative control.

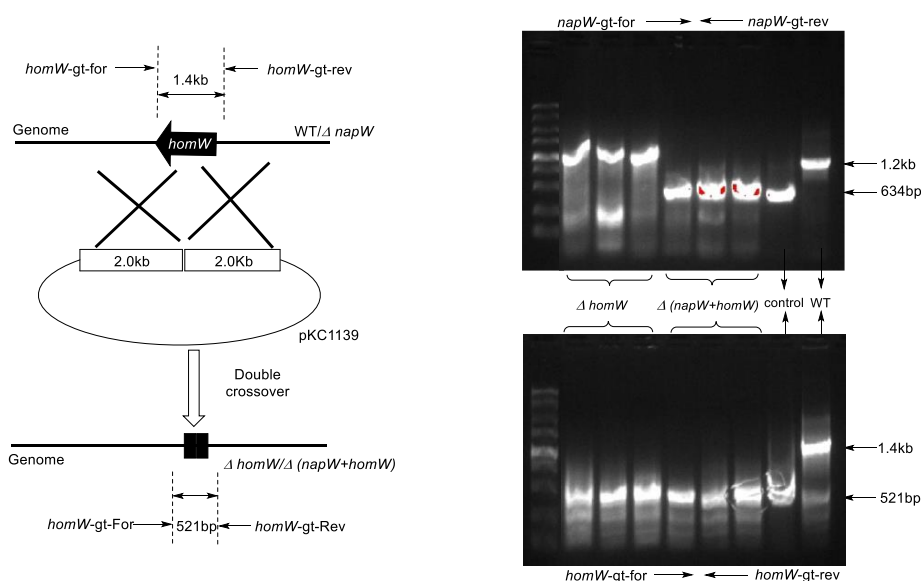

**Supplementary Figure 2.** Construction and verification of *homW* ( $\Delta homW$ , TG3023) and dual-gene ( $\Delta napW \& \Delta homW$ , TG3024) gene-knockout mutants of *S. lusitanus* NRRL 8034. **a**, Double crossover process. **b**, Genotyping validation of three  $\Delta homW$  mutant clones and three  $\Delta napW \& \Delta homW$  mutant clones. Control panels were plasmids pTG3032 and pTG3046 as positive control. Wild type (WT) was performed as negative control.

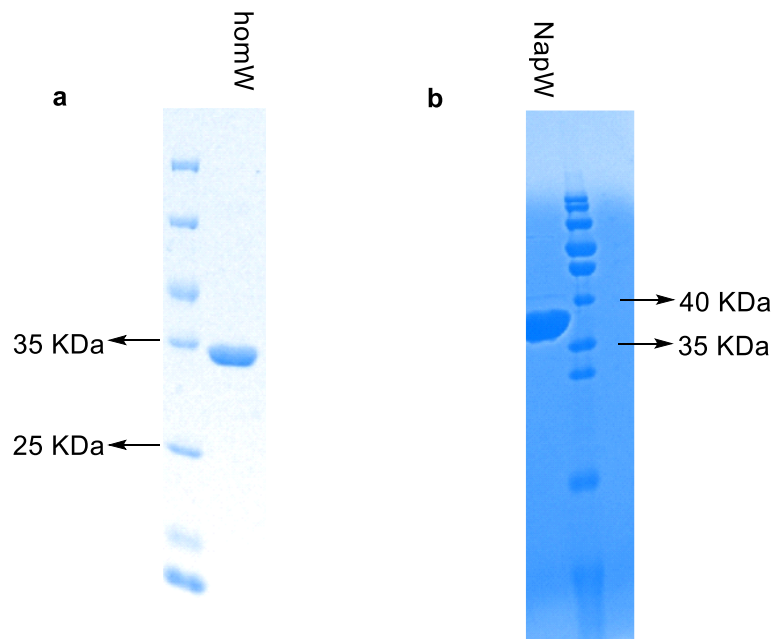

**Supplementary Figure 3.** Overproduction in *E. coli* and purification of two enzymes utilized in this study. **a**, SDS-PAGE analysis of purified homW. **b**, SDS-PAGE analysis of purified NapW.

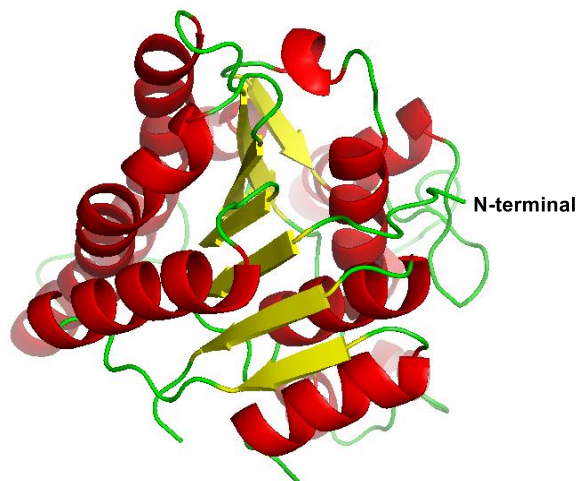

**Supplementary Figure 4.** Cartoon representation of chain A of NapW structure.

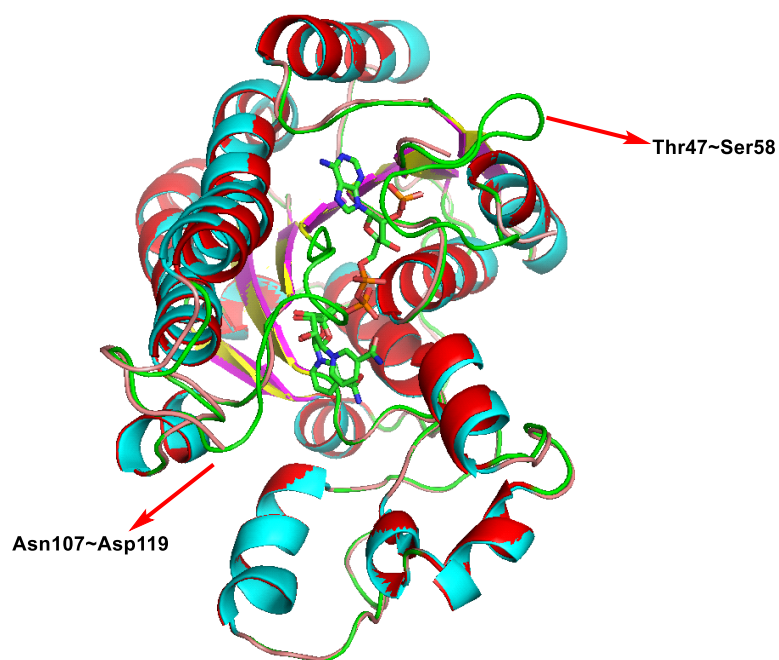

**Supplementary Figure 5.** Overlapping for structures of NapW-NADPH complex (helix/sheet/loop, red/yellow/green) and NapW (helix/sheet/loop, cyan/magenta/tint).

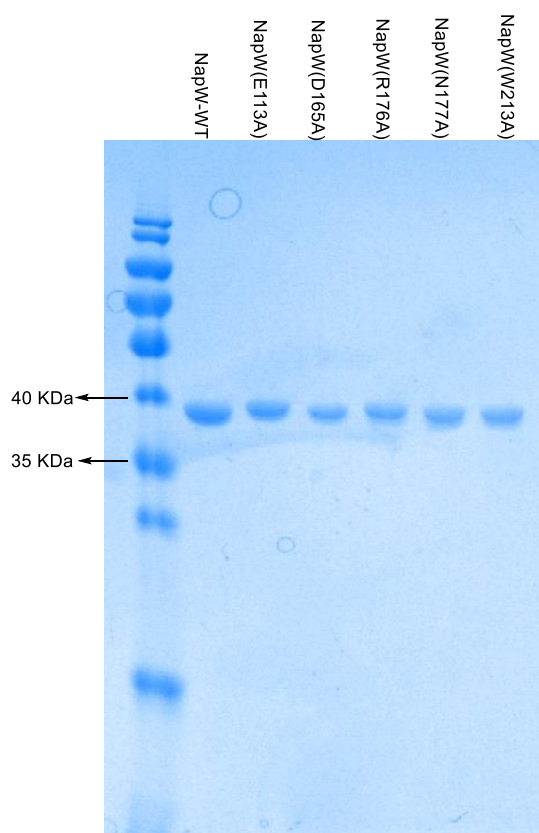

**Supplementary Figure 6.** Overproduction in *E. coli* and purification of NapW and mutants utilized in this study. These proteins were analyzed by SDS-PAGE.

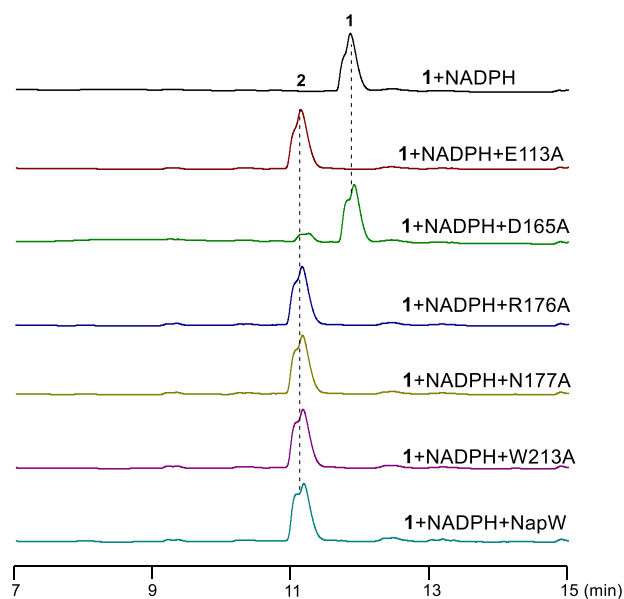

**Supplementary Figure 7.** Catalytic activity of the NapW mutants to NDM detected by HPLC. The HPLC analysis with UV detected at 270 nm.

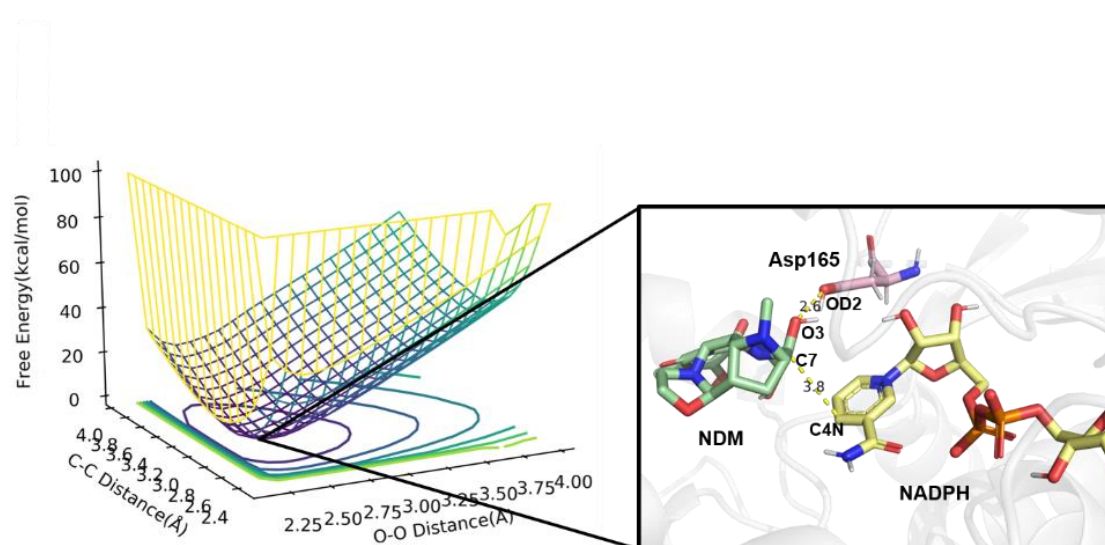

**Supplementary Figure 8.** The potential energy surface obtained from umbrella sampling. The  $d(\text{OD2-O3})$  represents the distance between the OD2 of Asp165 and O3 of NDM. The  $d(\text{C7-C4N})$  represents the distance between the C7 of NDM and the C4N of NADPH.

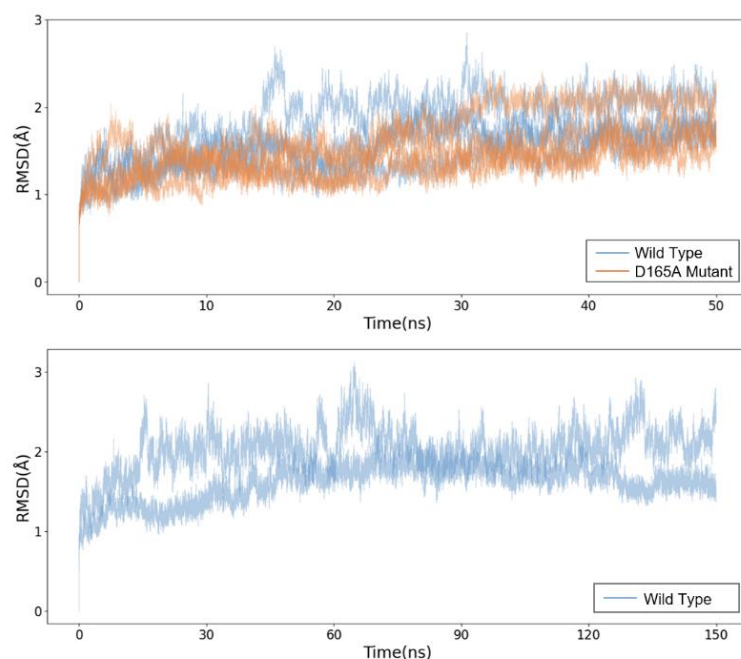

**Supplementary Figure 9.** The RMSD values of MD simulations in WT and D165A mutant systems. The RMSD values of 4×50 ns MD simulations in wild type and D165A mutant systems respectively. The wild type system was colored in blue while D165A mutant system was colored in orange. The RMSD values of 2×150 ns MD simulations in wild type system were demonstrated in the bottom.

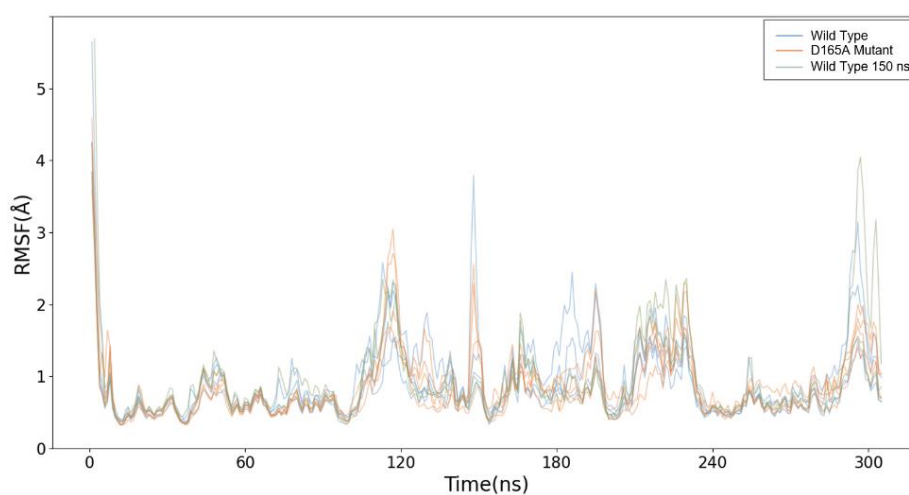

**Supplementary Figure 10.** The RMSF values of MD simulations in WT and D165A mutant. The RMSF values of 4×50 ns MD simulations in wild type system and D165A mutant systems were shown in blue and orange respectively. The RMSF values of 2×150 ns MD simulations in wild type system were shown in green.

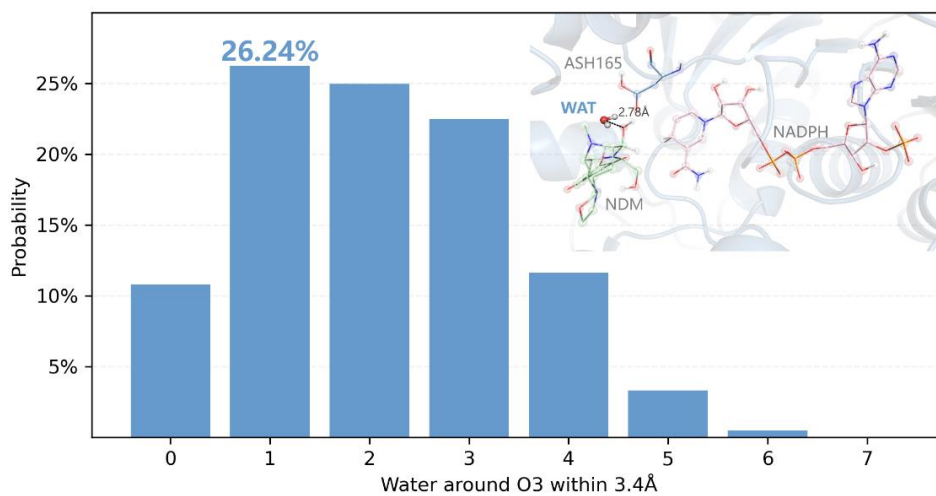

**Supplementary Figure 11.** The probability of water number within 3.4 Å of O3 atom of NDM in MD simulations. The water number within 3.4 Å of O3 atom of NDM was counted in two 150 ns trajectories. In the upper right, the representative water molecule was shown.



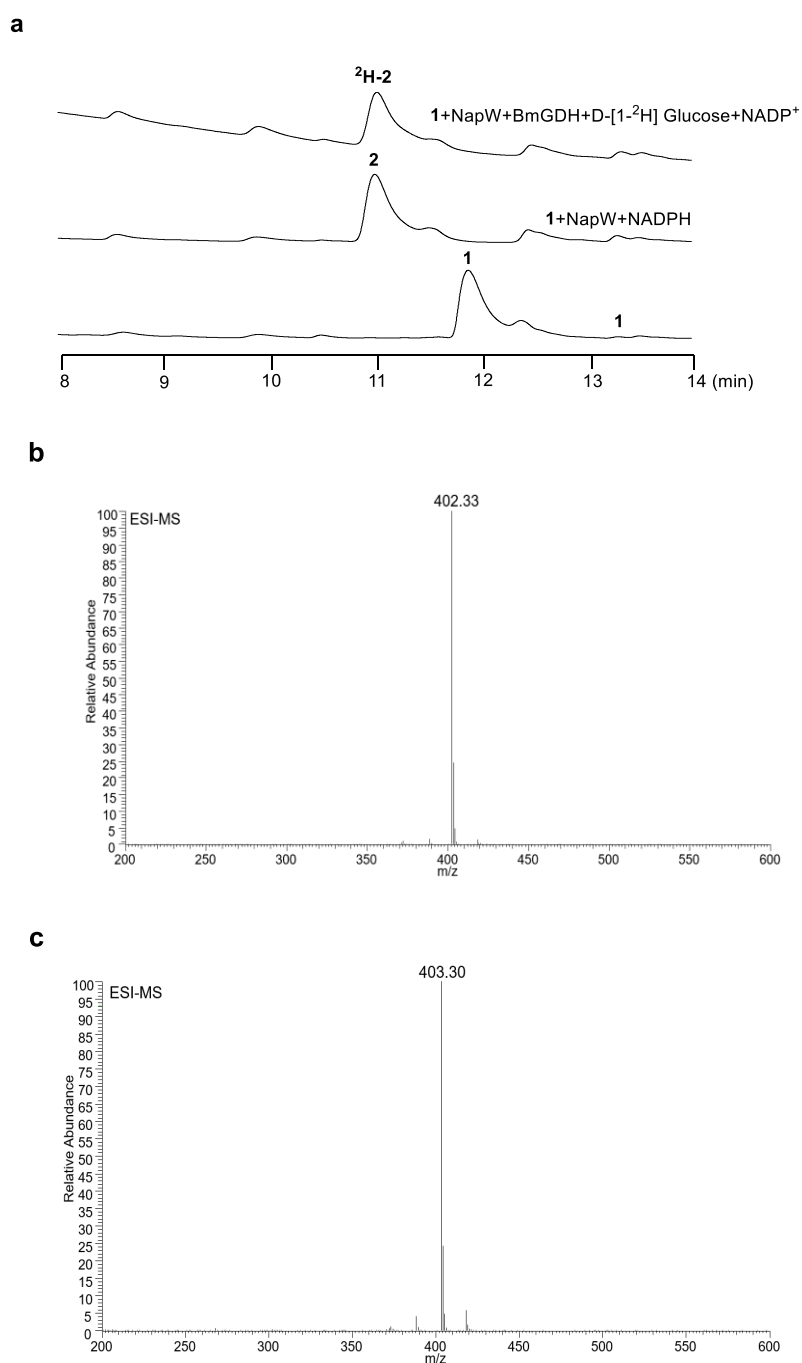

**Supplementary Figure 12.** Analysis of NapW/BmGDH cascade reaction. **a**, Result of NapW/BmGDH cascade reaction is detected by HPLC compared with controls, the HPLC analysis with UV detected at 270 nm. **b**, NapW-catalyzed product **2** is analyzed by ESI-MS. **c**, NapW/BmGDH-catalyzed product, **<sup>2</sup>H-2** is analyzed by ESI-MS.

**a**

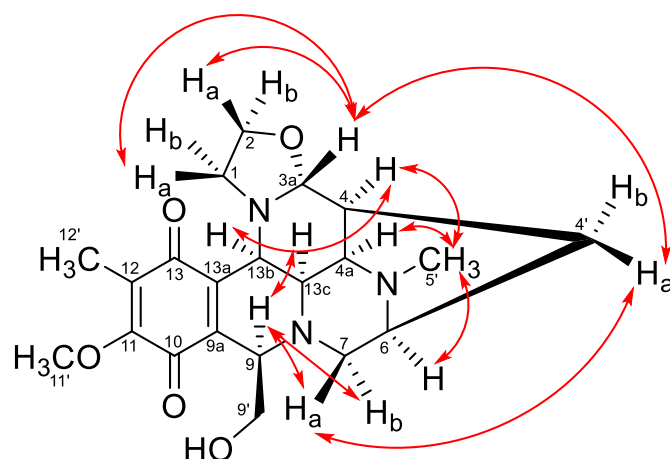

**b**

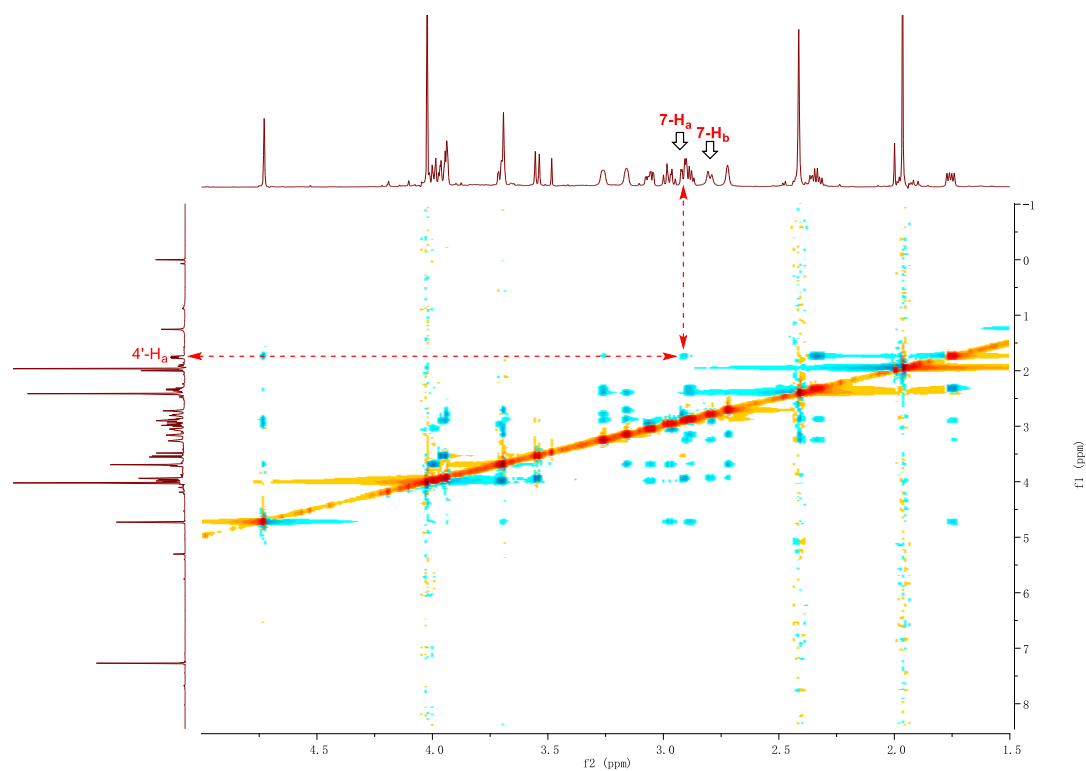

**Supplementary Figure 13. a**, NOEs (indicated by red arrows) determined the stereochemistry of compound 2. **b**, The NOE (indicated by red dashed arrows) between 4'-H<sub>a</sub> and 7-H<sub>a</sub> indicated the positions of 7-H<sub>a</sub> and 7-H<sub>b</sub> in space.

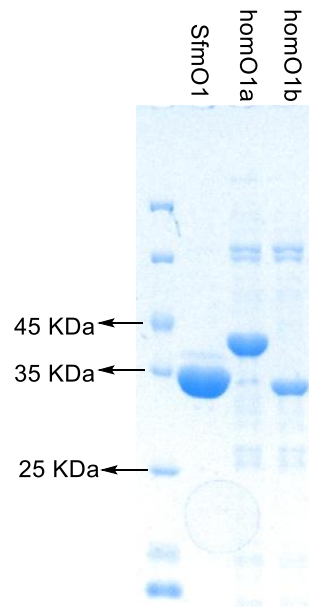

**Supplementary Figure 14.** Overproduction in *E. coli* and purification of SfmO1, homO1a and homO1b utilized in this study. These proteins were analyzed by SDS-PAGE.

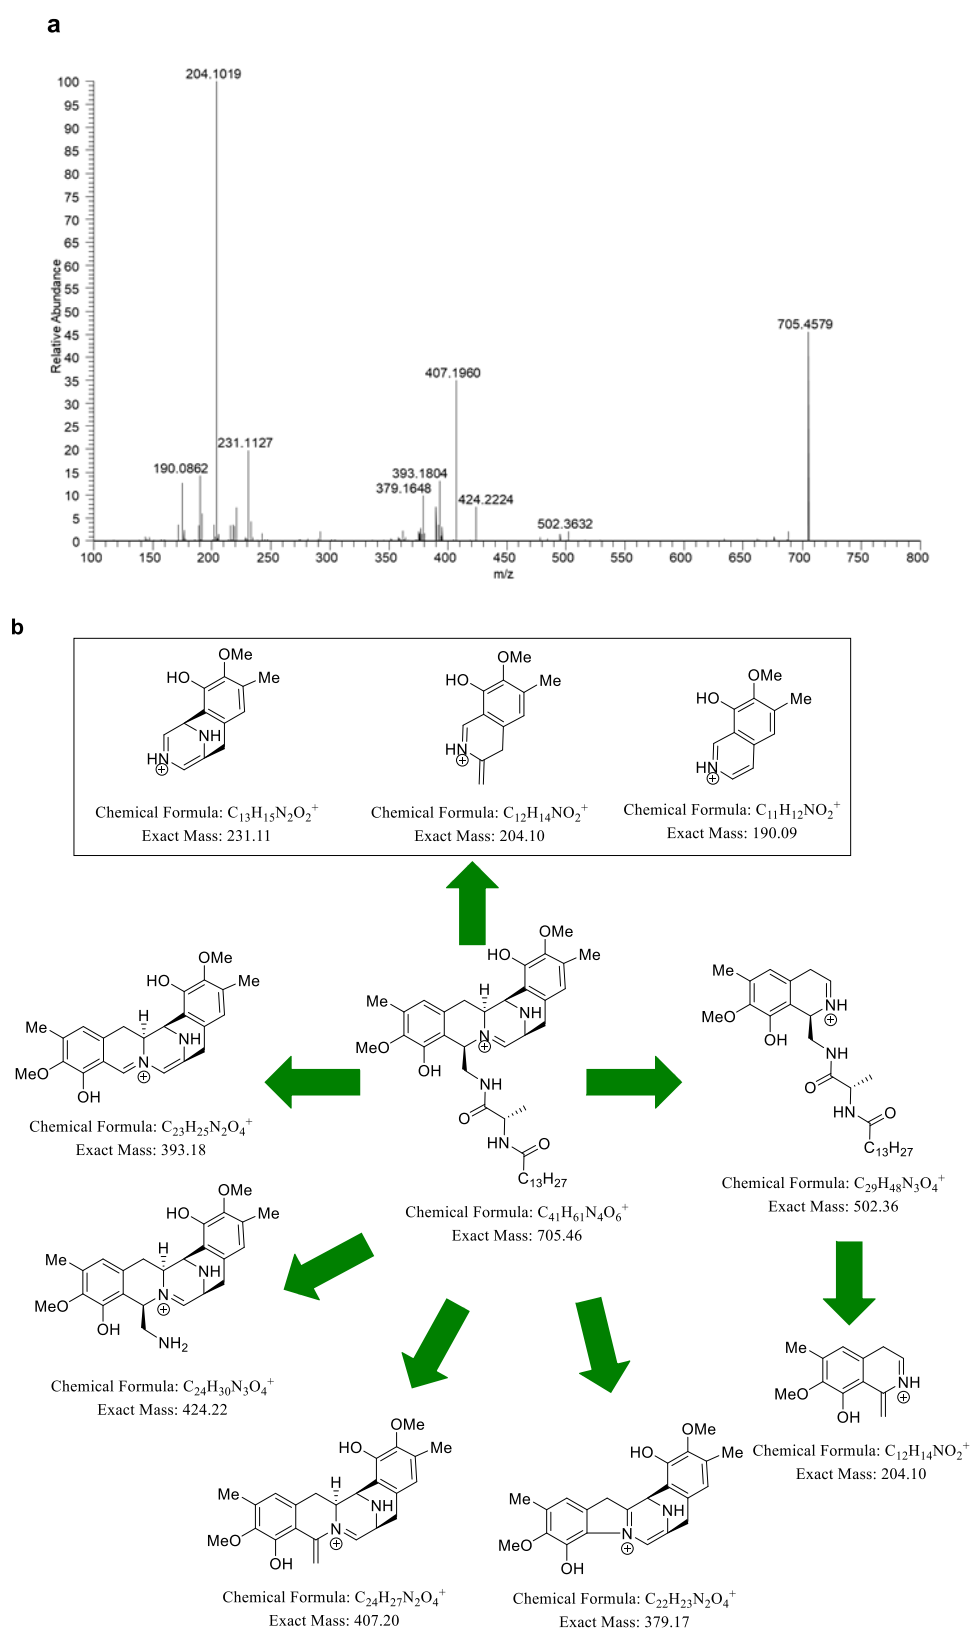

**Supplementary Figure 15. HR-MS/MS analysis of 16. a, HR-MS/MS analysis of 16. b, Analysis of fragments of 16.**

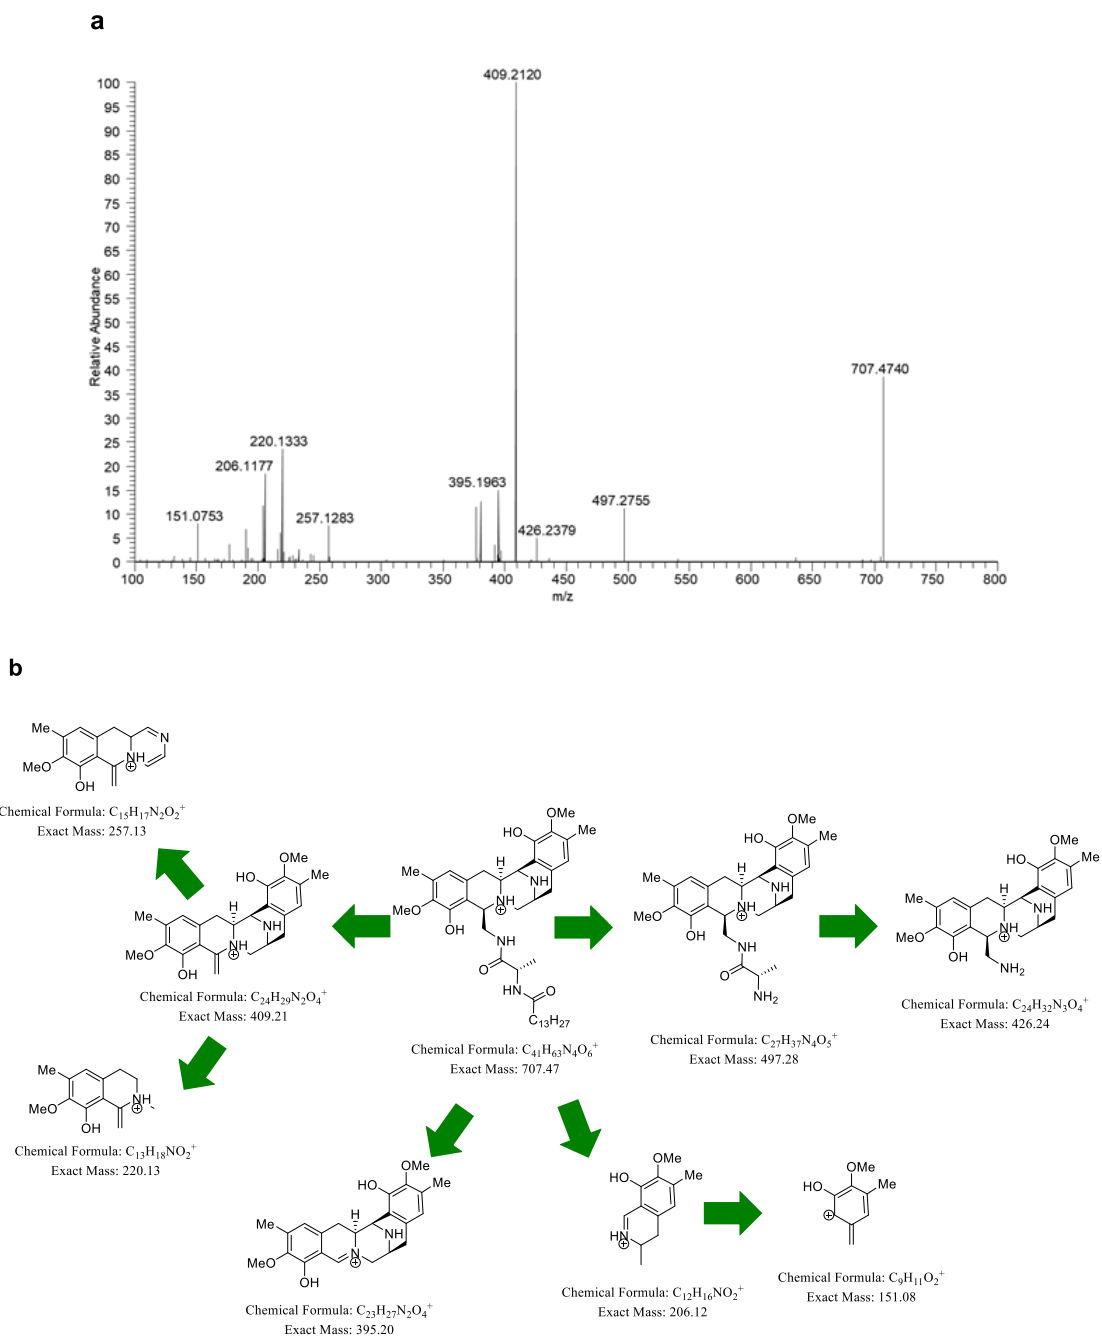

**Supplementary Figure 16.** HR-MS/MS analysis of **17**. **a**, HR-MS/MS analysis of **17**. **b**, Analysis of fragments of **17**.

**a**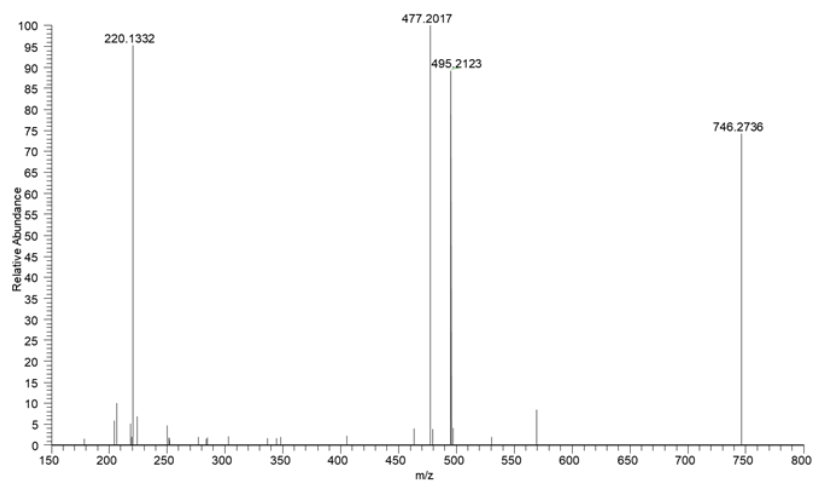**b**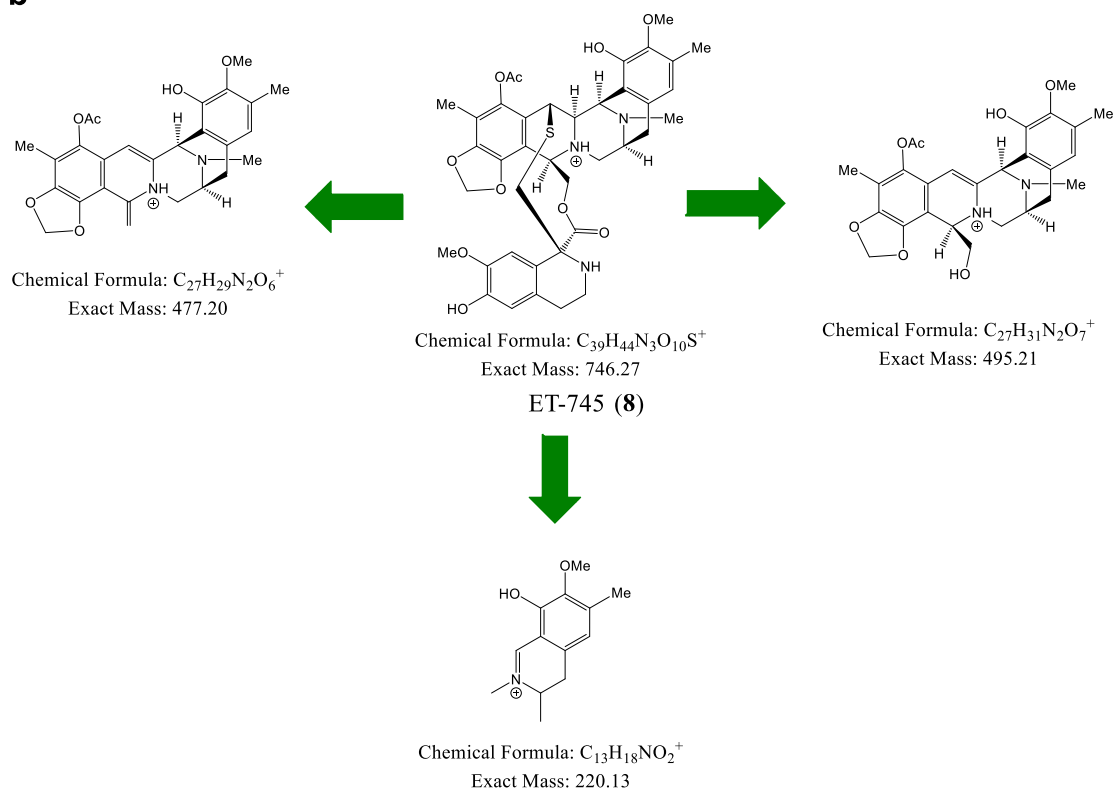

**Supplementary Figure 17. HR-MS/MS analysis of ET-745 (8). a, HR-MS/MS analysis of 8. b, Analysis of fragments of 8.**

a

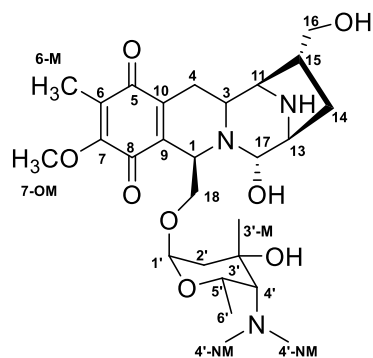

18

b

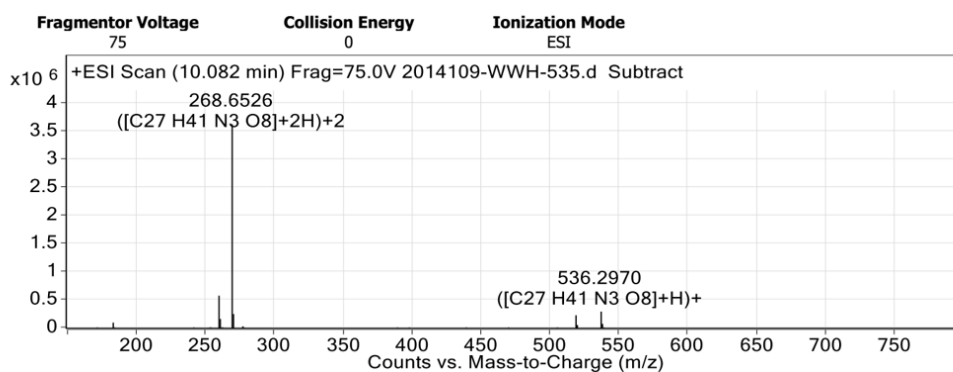

#### Formula Calculator Results

| Ion Formula   | m/z      | m/z (Calc) | Diff (ppm) | DBE  | Score (MFG) |
|---------------|----------|------------|------------|------|-------------|
| C27 H42 N3 O8 | 536.2970 | 536.2966   | -0.67      | 9    | 99.76       |
| C30 H40 N4 O5 | 536.2970 | 536.2993   | 4.34       | 13.5 | 90.76       |
| C39 H38 N O   | 536.2970 | 536.2948   | -4.13      | 22   | 91.55       |
| Ion Formula   | m/z      | m/z (Calc) | Diff (ppm) | DBE  | Score (MFG) |
| C27 H43 N3 O8 | 268.6526 | 268.6520   | -2.39      | 9    | 96.97       |
| C30 H41 N4 O5 | 268.6526 | 268.6533   | 2.61       | 13.5 | 96.41       |

c

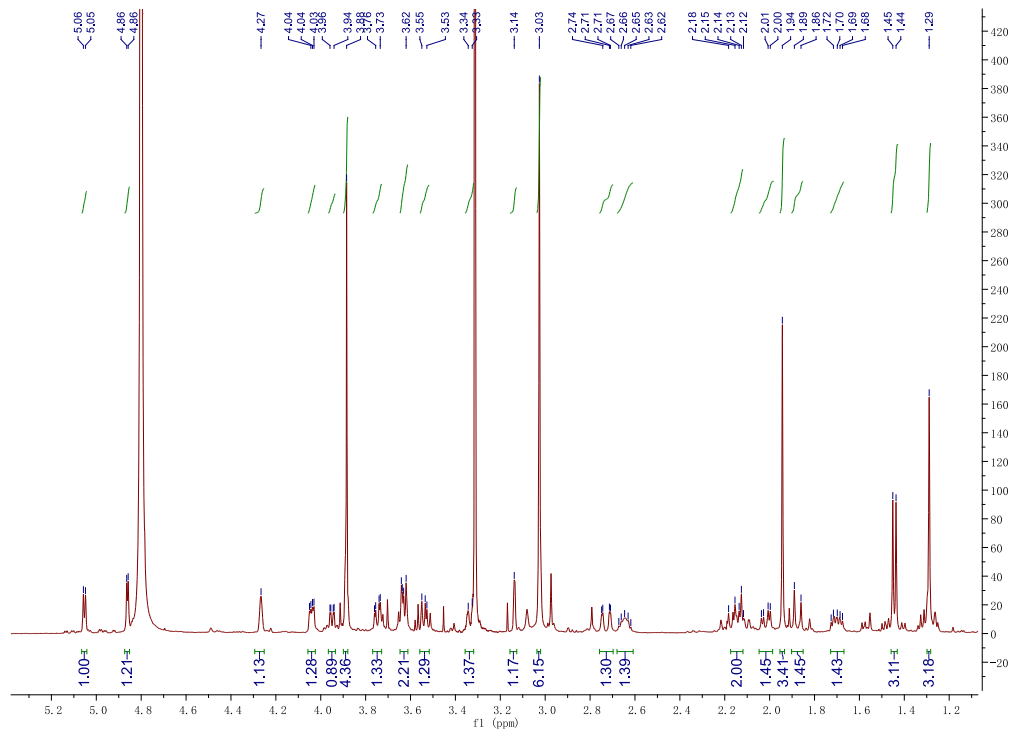

d

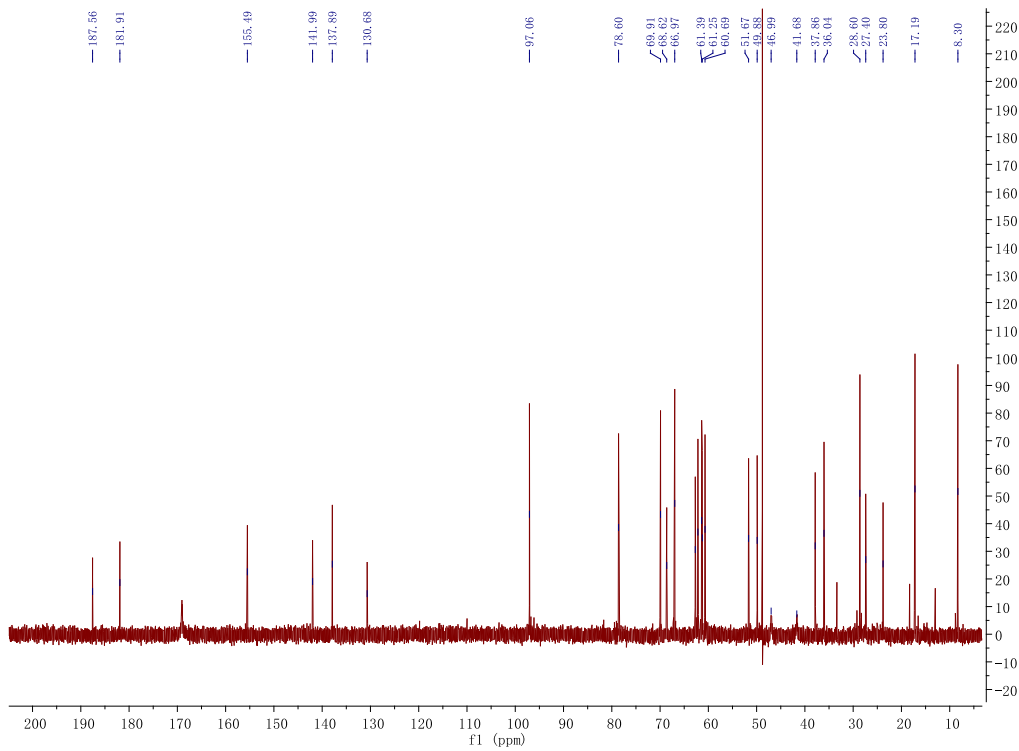



**e**

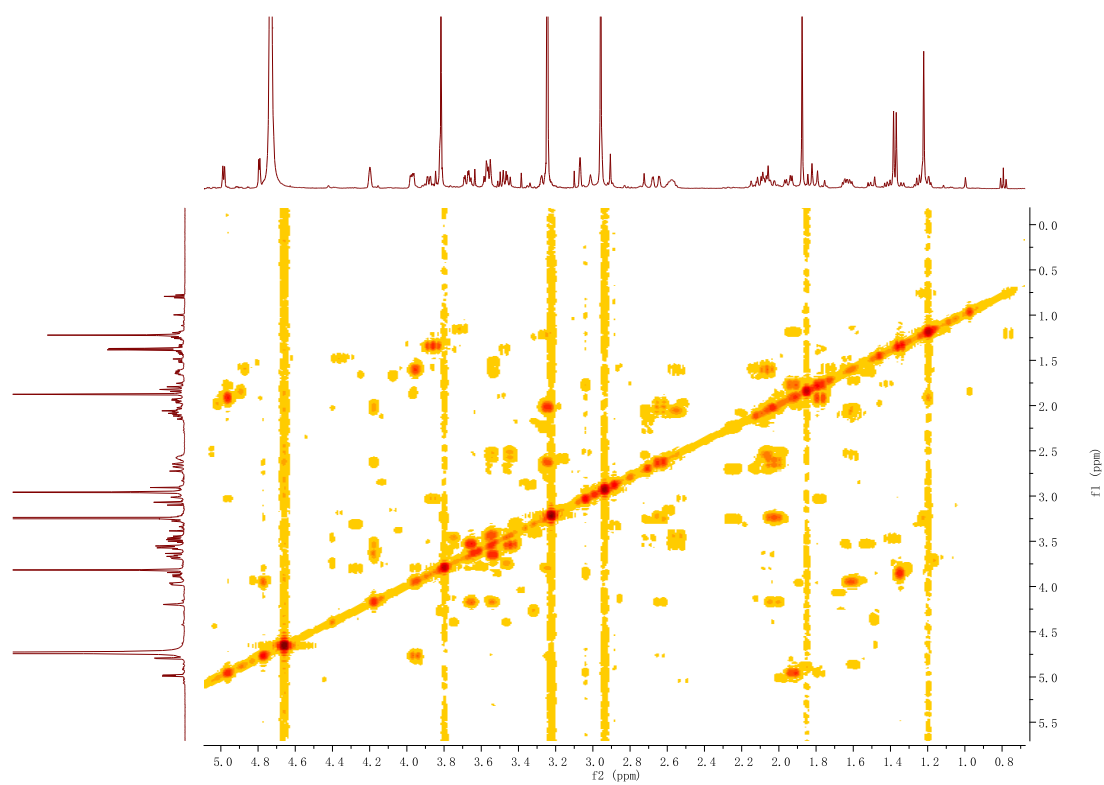

**f**

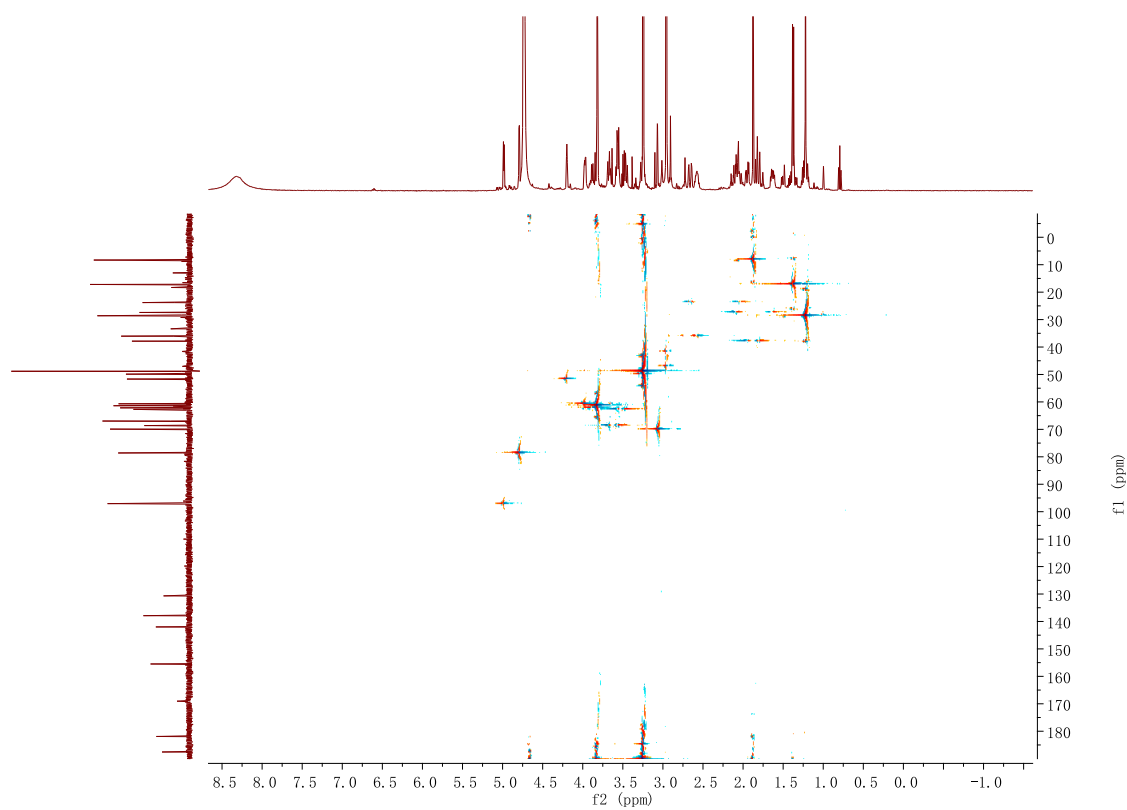

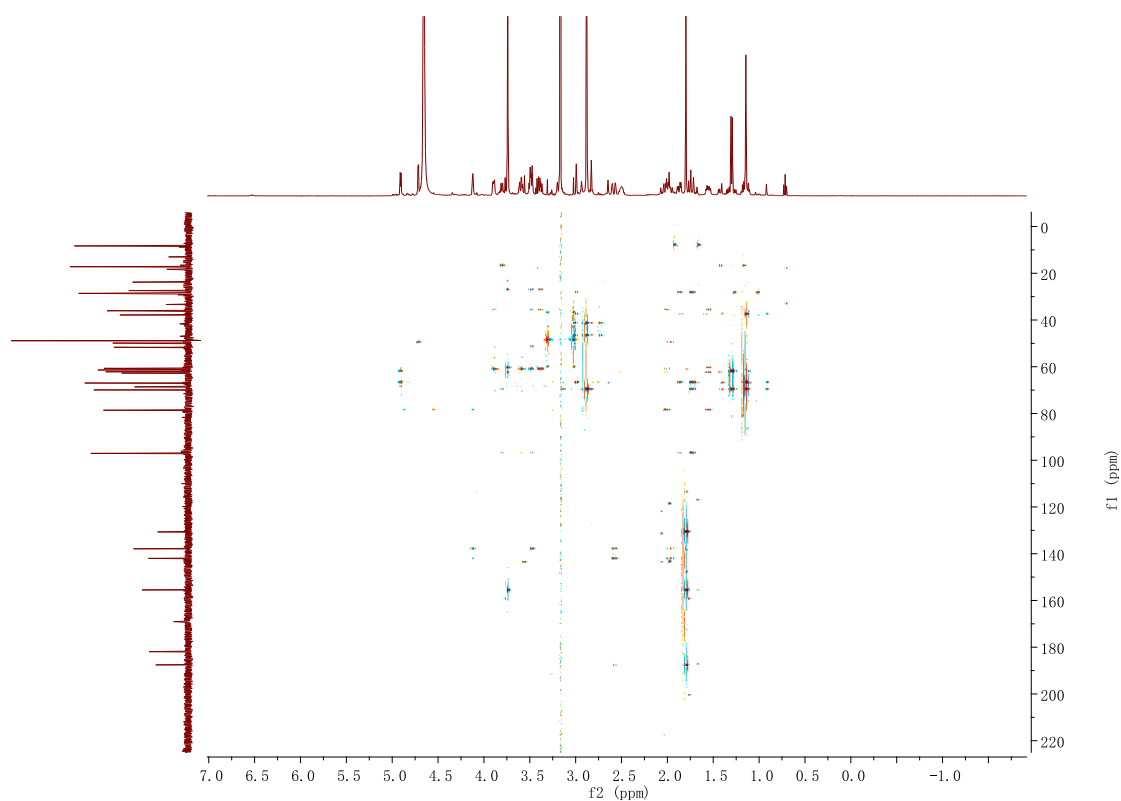

**Supplementary Figure 18.** Structure characterization data of **18**. The stereochemistry of **18** was determined by comparing with LMM<sup>1</sup>. **a**, Structure of **18**. **b**, HR-MS analysis of **18**. HRMS (ESI):  $m/z = 536.2970$  ( $[M+H]^+$ ),  $m/z$  (calculated [calc.]) = 536.2966 ( $[M+H]^+$ ) consistent with the molecular formula  $C_{27}H_{41}N_3O_8$ ; UV max: 222 nm, 272 nm. **c**,  $^1H$  NMR spectrum of **18**. **d**,  $^{13}C$  NMR spectrum of **18**. **e**,  $^1H$ - $^1H$  COSY spectrum of **18**. **f**, HSQC spectrum of **18**. **g**, HMBC spectrum of **18**.

a

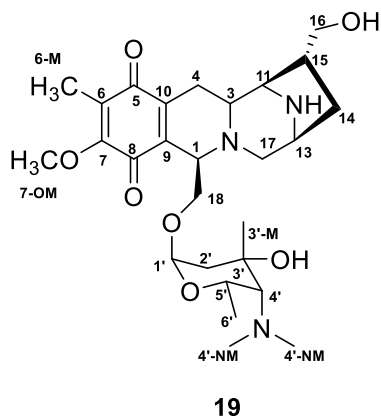

b

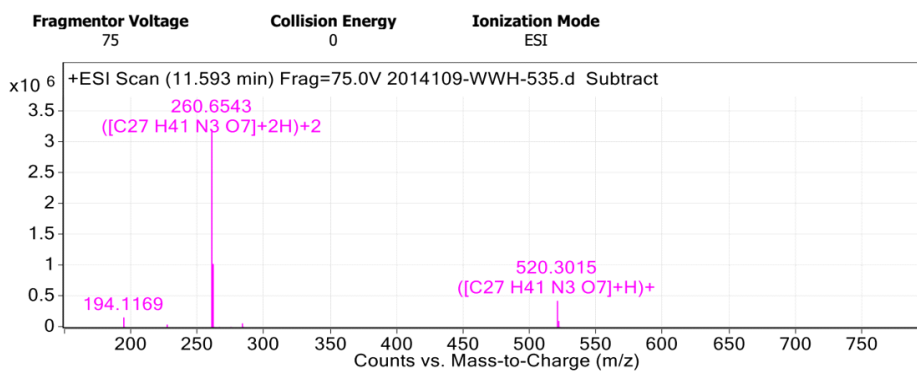

**Formula Calculator Results**

| Ion Formula    | m/z      | m/z (Calc) | Diff (ppm) | DBE | Score (MFG) |
|----------------|----------|------------|------------|-----|-------------|
| C24 H45 N2 O10 | 260.6543 | 260.6532   | -4.38      | 4.5 | 90.78       |
| C27 H43 N3 O7  | 260.6543 | 260.6545   | 0.78       | 9   | 99.68       |
| Ion Formula    | m/z      | m/z (Calc) | Diff (ppm) | DBE | Score (MFG) |
| C24 H44 N2 O10 | 520.3015 | 520.2990   | -4.72      | 4.5 | 89.47       |
| C27 H42 N3 O7  | 520.3015 | 520.3017   | 0.44       | 9   | 99.9        |

c

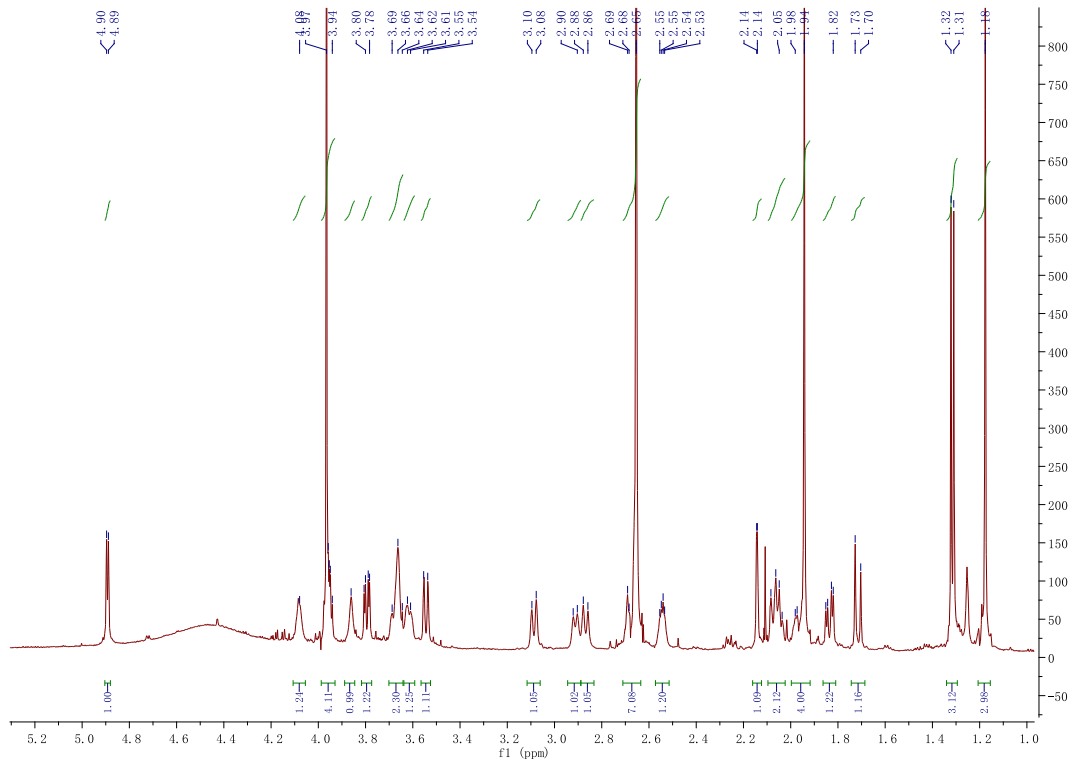

d

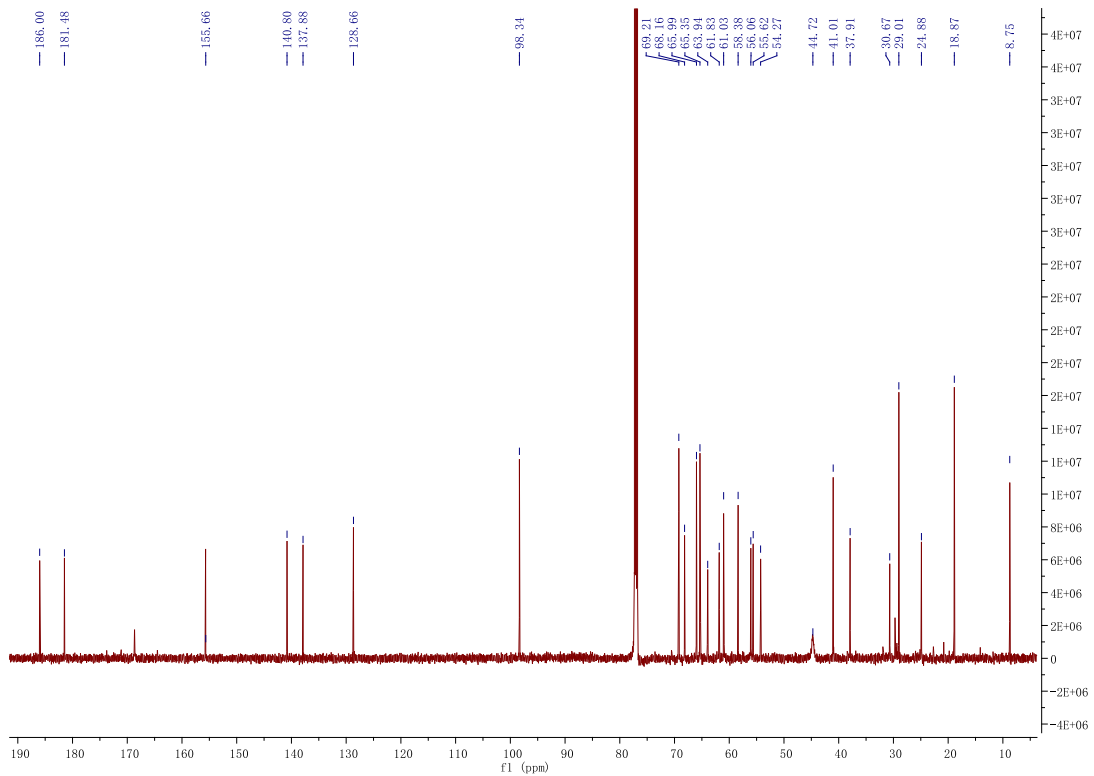

**e**

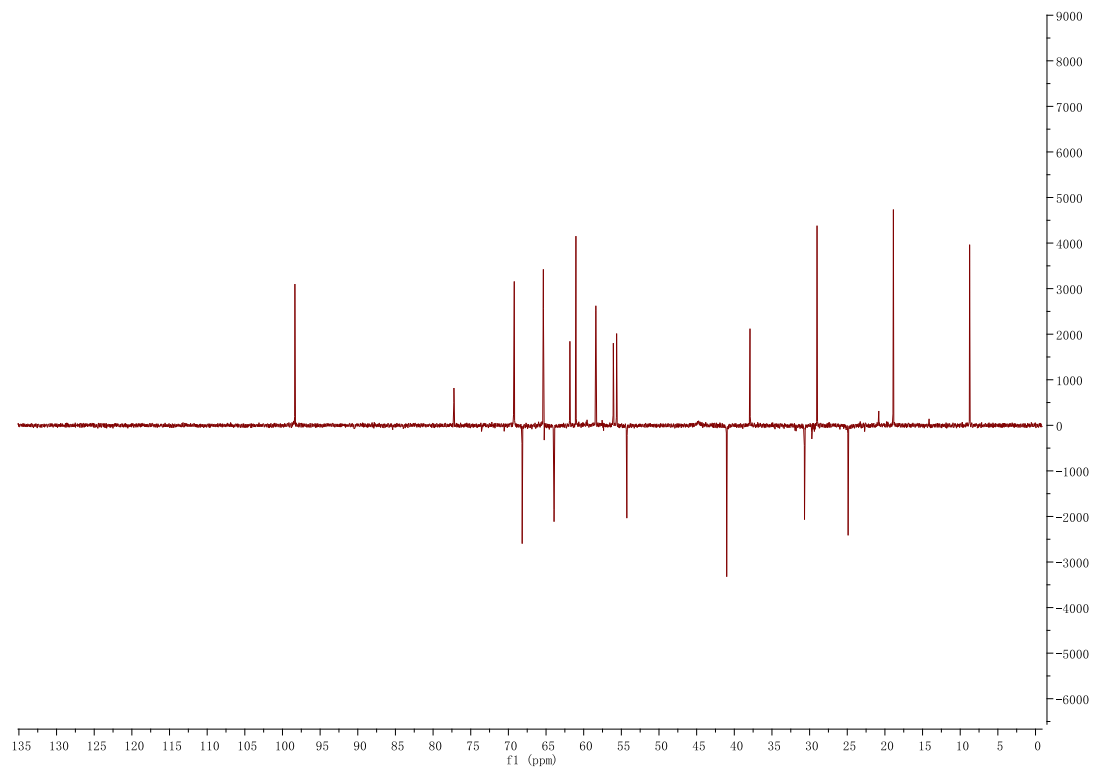

**f**

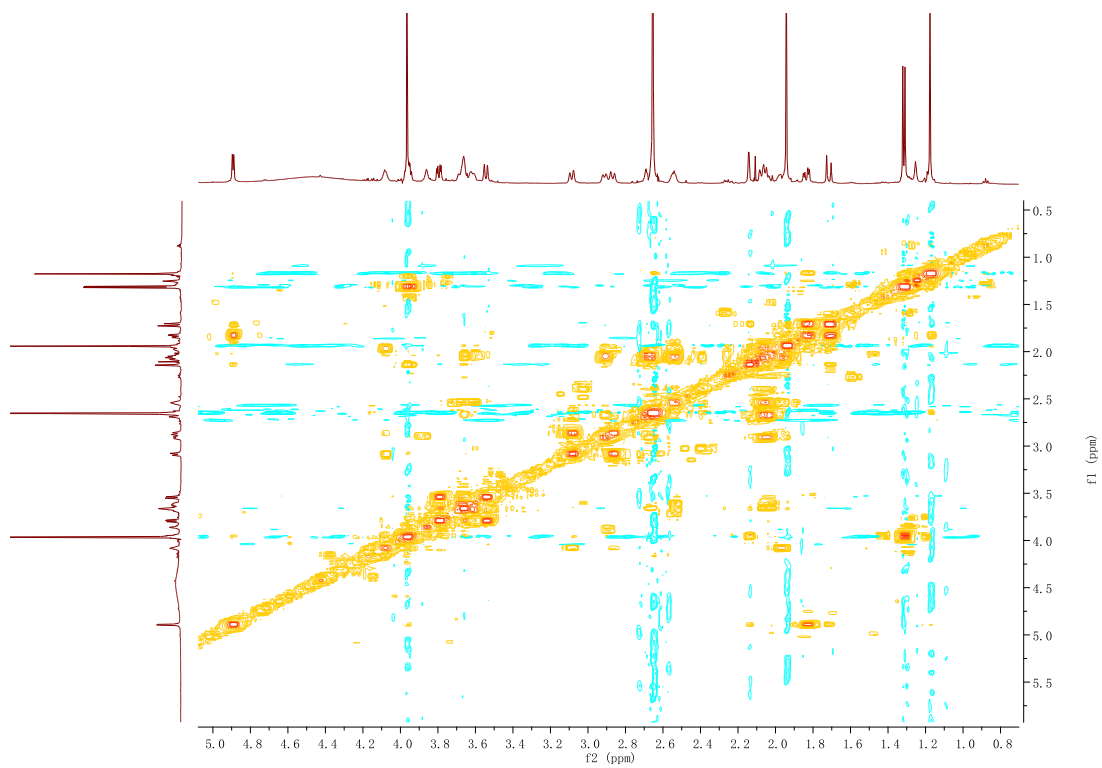

**g**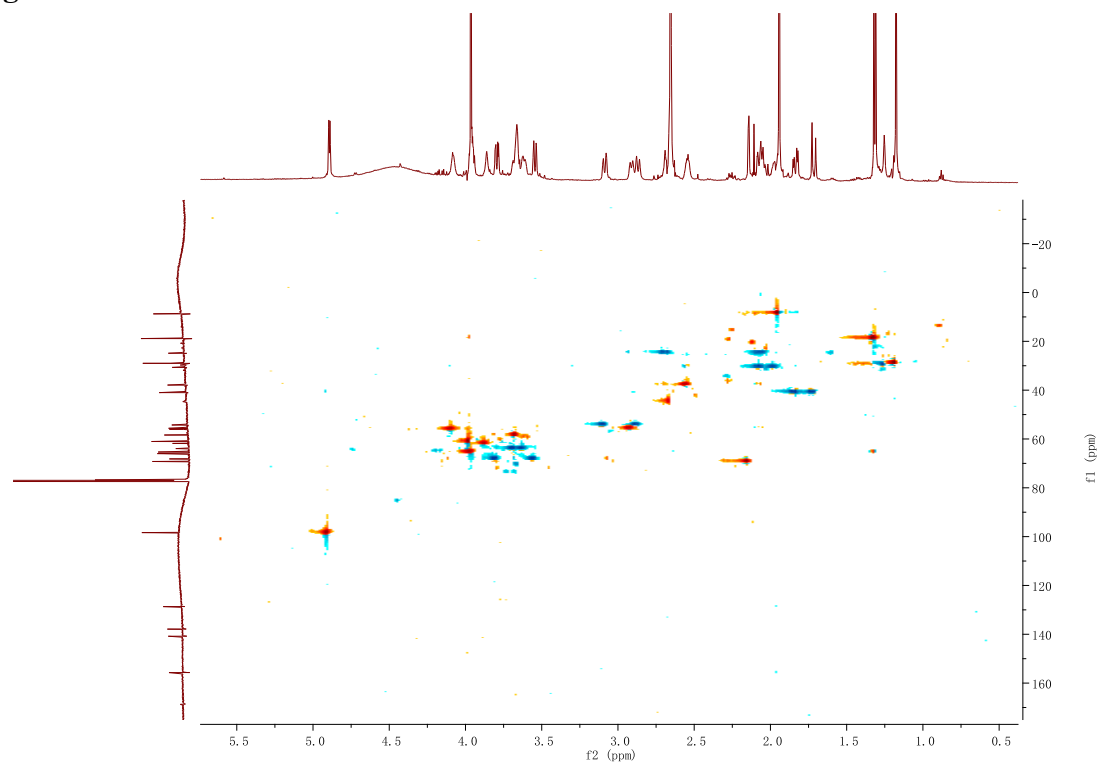**h**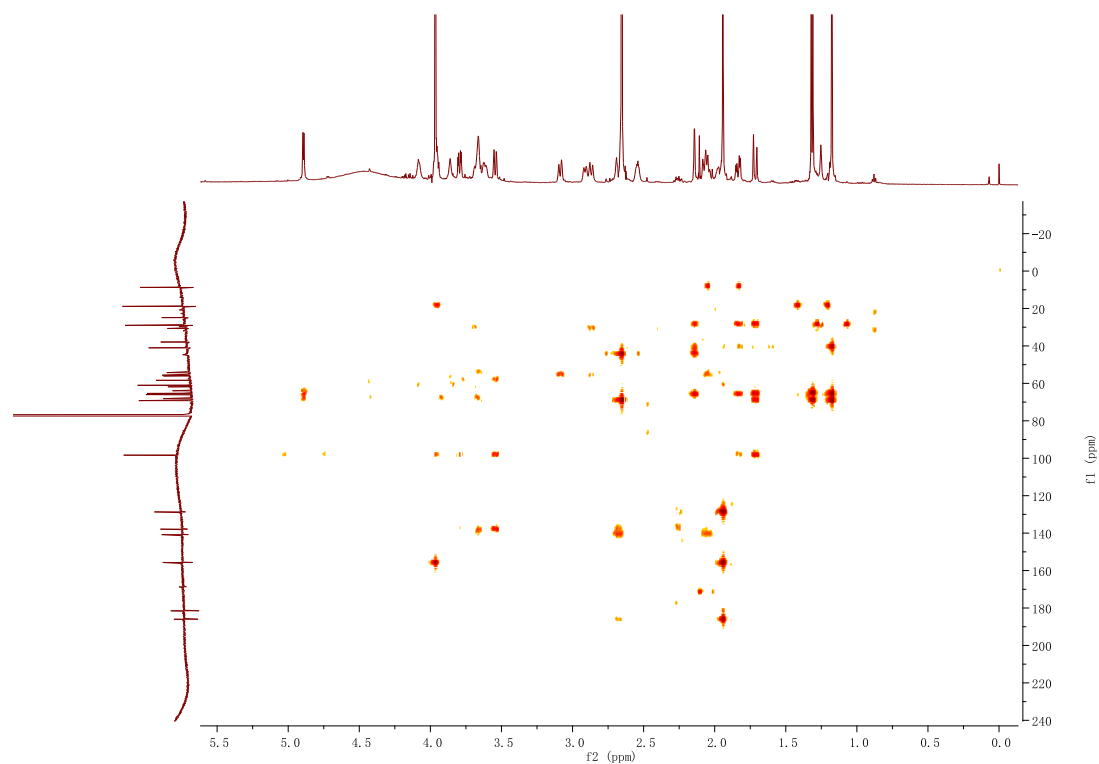

**Supplementary Figure 19.** Structure characterization data of **19**. **a**, Structure of **19**. **b**, HR-MS analysis of **19**. HRMS (ESI):  $m/z = 520.3015$  ( $[M+H]^+$ ),  $m/z$  (calculated [calc.]) = 520.3017 ( $[M+H]^+$ ) consistent with the molecular formula  $C_{27}H_{41}N_3O_7$ ; UV max: 222 nm, 272 nm. **c**, <sup>1</sup>H NMR spectrum of **19**. **d**, <sup>13</sup>C NMR spectrum of **19**. **e**, DEPT135

spectrum of **19**. **f**,  $^1\text{H}$ - $^1\text{H}$  COSY spectrum of **19**. **g**, HSQC spectrum of **19**. **h**, HMBC spectrum of **19**.

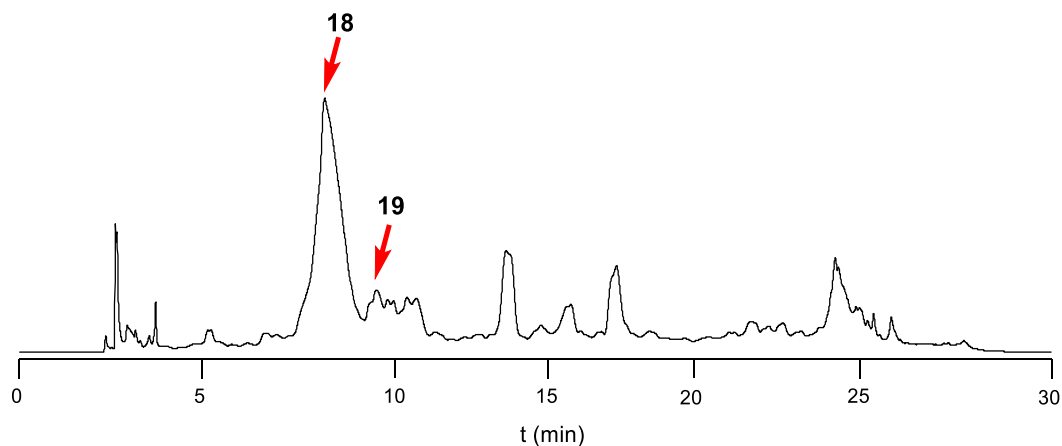

**Supplementary Figure 20.** Fermentation analysis of LMM producing strain, *S. candidus* LL-AP191. The HPLC analysis with UV detected at 270 nm. The peaks of **18** and **19** both were detected in fermentation supernatant.

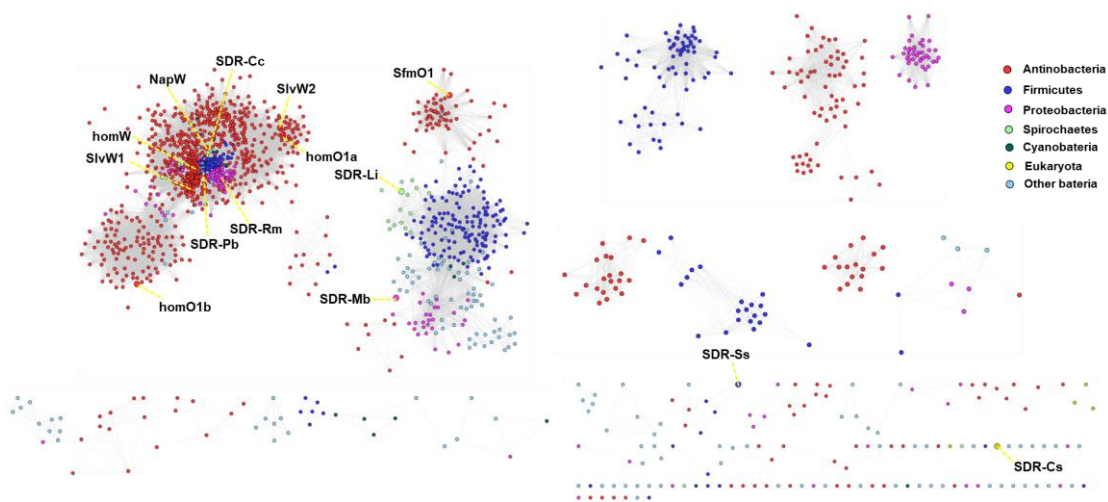

**Supplementary Figure 21.** Sequence similarity network (SSN) analysis of NapW-homologues. 4771 homologous proteins of NapW (above 34% sequence identity with NapW) were clustered by sequence identity cut-off<sup>2</sup> at 0.9. The SSN was generated from the representatives of the clusters and NapW, homW, SfmO1, homO1a, homO1b by using the online Enzyme Function Initiative-Enzyme Similarity Tool<sup>3</sup>. Cytoscape was used to view the SSN with an alignment score threshold of  $10^{-105}$ . The proteins mentioned in manuscript were marked.

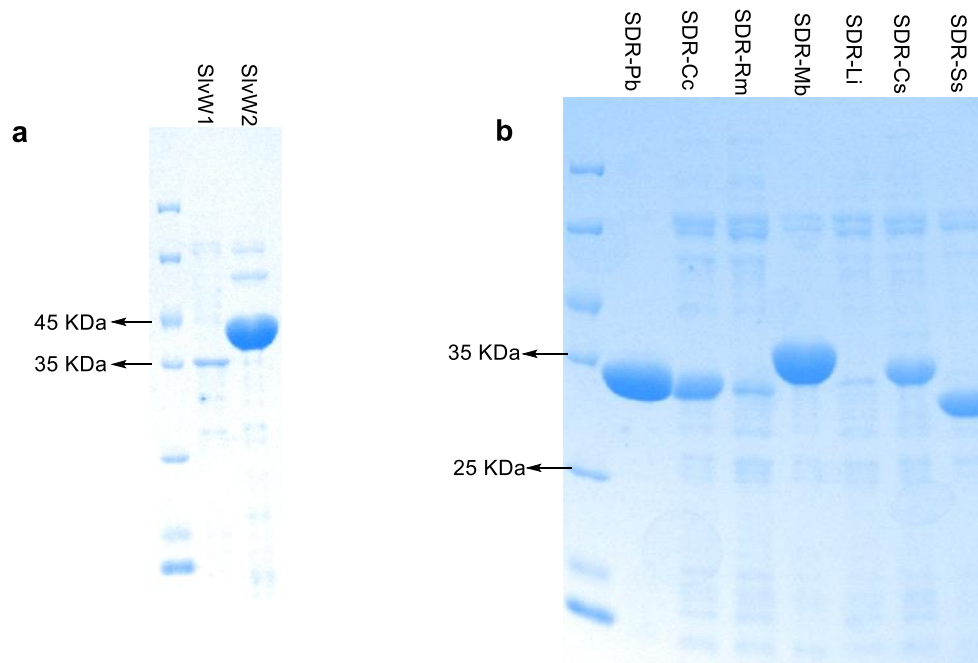

**Supplementary Figure 22.** Overproduction in *E. coli* and purification of SDR utilized in this study. **a**, SDS-PAGE analysis of SlvW1 and SlvW2. **b**, SDS-PAGE analysis of SDRs: SDR-Pb, SDR-Cc, SDR-Rm, SDR-Mb, SDR-Li, SDR-Cs, SDR-Ss.



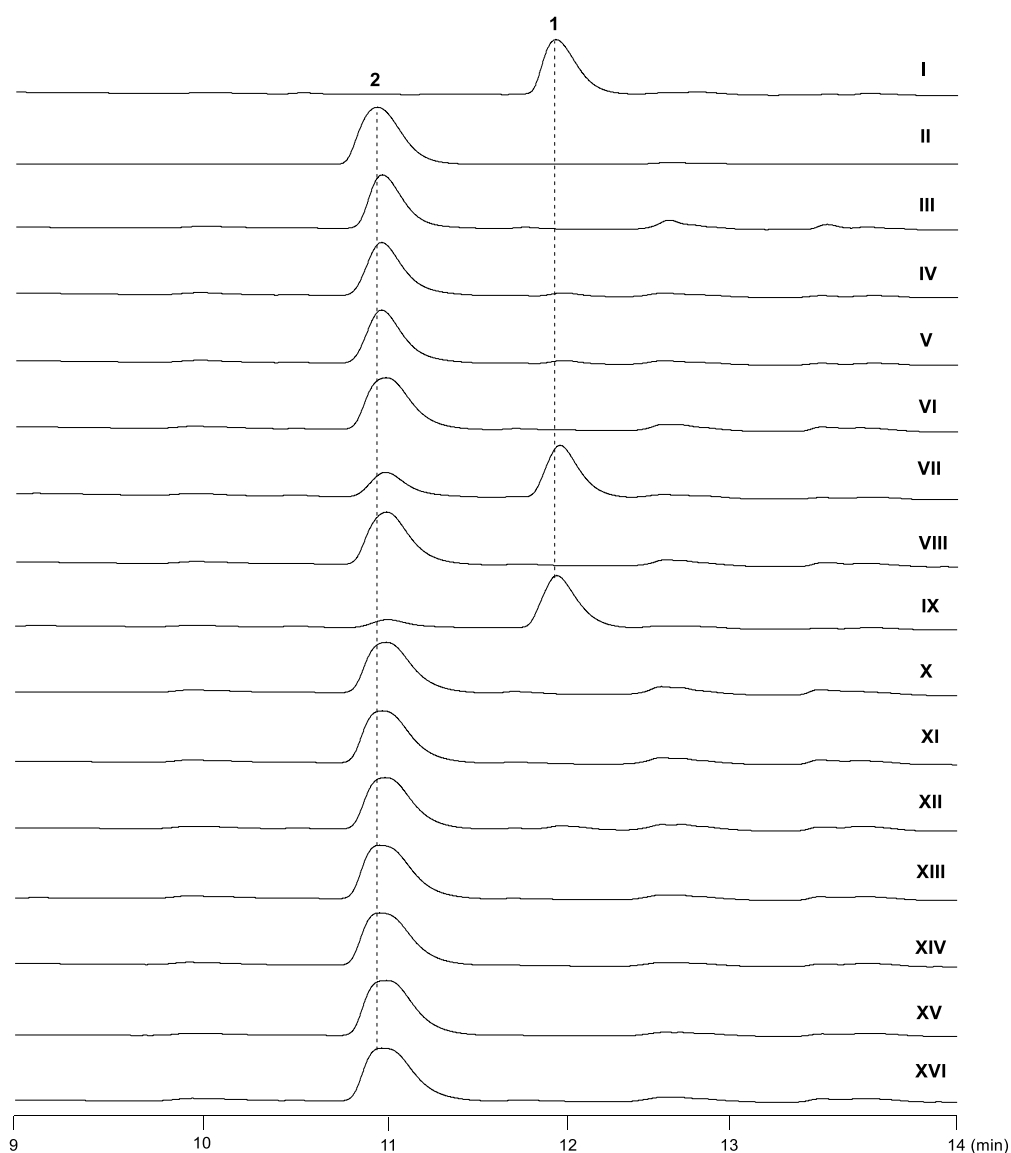

**Supplementary Figure 23.** Enzymatic assays of NapW and homologous proteins towards **1** were detected by HPLC analysis with UV absorption wavelength at 270 nm. (I) Substrate **1** prepared by NapU-catalyzed reaction + NADPH, (II) Standard **2**, (III) **1** + NADPH + SDR-Pb, (IV) **1** + NADPH + SDR-Cc, (V) **1** + NADPH + SDR-Rm, (VI) **1** + NADPH + SDR-Mb, (VII) **1** + NADPH+SDR-Li, (VIII) **1** + NADPH + SDR-Cs, (IX) **1** + NADPH + SDR-Ss, (X) **1** + NADPH + NapW, (XI) **1** + NADPH + homW, (XII) **1** + NADPH + SfmO1, (XIII) **1** + NADPH + homO1a, (XIV) **1** + NADPH + homO1b, (XV) **1** + NADPH + SlvW1, (XVI) **1** + NADPH + SlvW2.

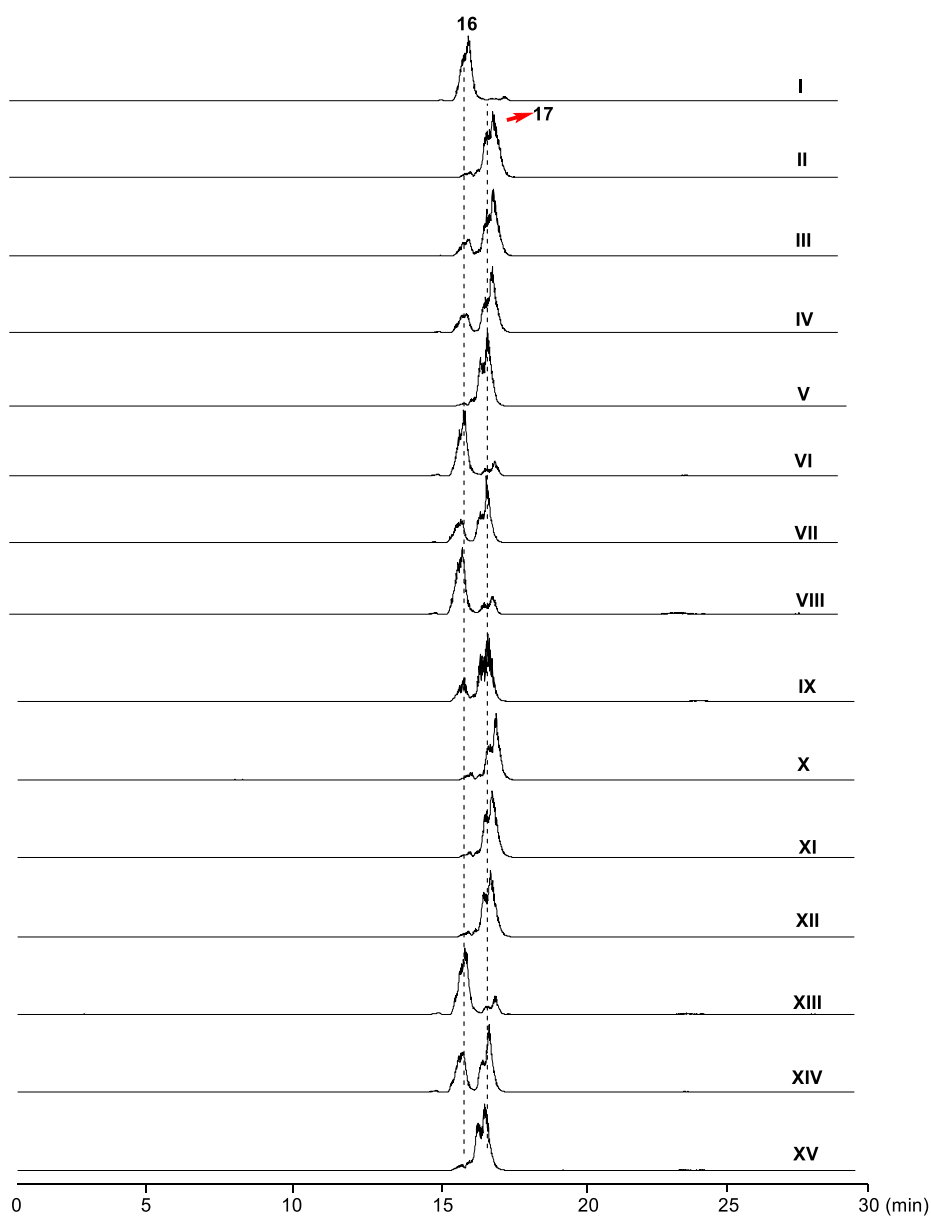

**Supplementary Figure 24.** Enzymatic assays of NapW and homologous proteins towards **16** were detected by HPLC-MS. (I) Substrate **16** prepared by SfmC-catalyzed reaction + NADPH, (II) **16** + NADPH + SDR-Pb, (III) **16** + NADPH + SDR-Cc, (IV) **16** + NADPH + SDR-Rm, (V) **16** + NADPH + SDR-Mb, (VI) **16** + NADPH+SDR-Li, (VII) **16** + NADPH + SDR-Cs, (VIII) **16** + NADPH + SDR-Ss, (IX) **16** + NADPH + NapW, (X) **16** + NADPH + homW, (XI) **16** + NADPH + SfmO1, (XII) **16** + NADPH + homO1a, (XIII) **16** + NADPH + homO1b, (XIV) **16** + NADPH + SlvW1, (XV) **16** + NADPH + SlvW2.

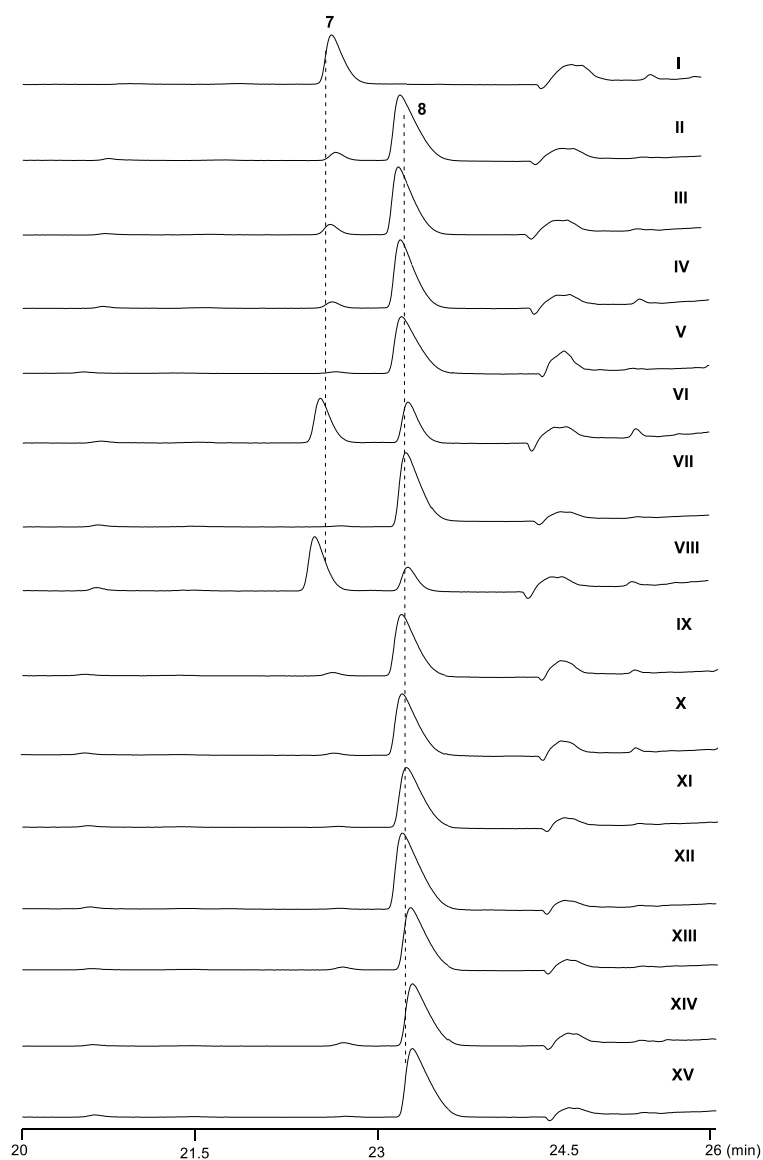

**Supplementary Figure 25.** Enzymatic assays of NapW and homologous proteins towards **7** were detected by HPLC analysis with UV absorption wavelength at 270 nm. (I) Substrate **7** + NADPH, (II) **7**+ NADPH + SDR-Pb, (III) **7** + NADPH + SDR-Cc, (IV) **7** + NADPH + SDR-Rm, (V) **7** + NADPH + SDR-Mb, (VI) **7** + NADPH+SDR-Li, (VII) **7** + NADPH + SDR-Cs, (VIII) **7** + NADPH + SDR-Ss, (IX) **7** + NADPH + NapW, (X) **7** + NADPH + homW, (XI) **7** + NADPH + SfmO1, (XII) **7** + NADPH + homO1a, (XIII) **7** + NADPH + homO1b, (XIV) **7** + NADPH + SlvW1, (XV) **7** + NADPH + SlvW2.

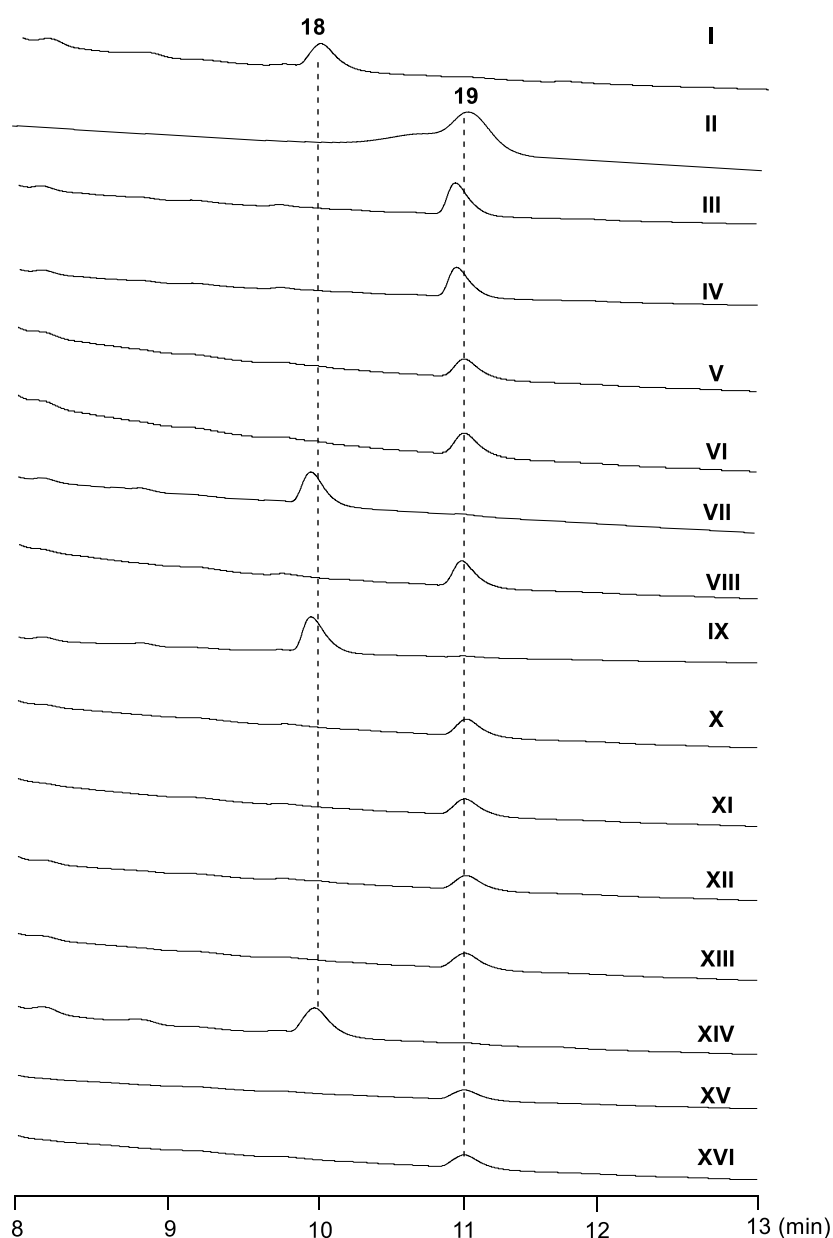

**Supplementary Figure 26.** Enzymatic assays of NapW and homologous proteins towards **18** were detected by HPLC analysis with UV absorption wavelength at 270 nm. (I) Substrate **18** + NADPH, (II) Standard **19**, (III) **18** + NADPH + SDR-Pb, (IV) **18** + NADPH + SDR-Cc, (V) **18** + NADPH + SDR-Rm, (VI) **18** + NADPH + SDR-Mb, (VII) **18** + NADPH + SDR-Li, (VIII) **18** + NADPH + SDR-Cs, (IX) **18** + NADPH + SDR-Ss, (X) **18** + NADPH + NapW, (XI) **18** + NADPH + homW, (XII) **18** + NADPH + SfmO1, (XIII) **18** + NADPH + homO1a, (XIV) **18** + NADPH + homO1b, (XV) **18** + NADPH + SlvW1, (XVI) **18** + NADPH + SlvW2.

## Supplementary References

1. Whaley, H. A., Patterson, E. L., Dann, M., Shay, A. J. & Porter, J. N. Isolation and characterization of lemomycin, a new antibiotic. *Antimicrob. Agents Chemother.* **14**, 83-86 (1964).
2. Huang, Y., Niu, B., Gao, Y., Fu, L. & Li, W. CD-HIT Suite: A web server for clustering and comparing biological sequences. *Bioinformatics* **26**, 680-682 (2010).
3. Gerlt, J. A. et al. Enzyme function initiative-enzyme similarity tool (EFI-EST): A web tool for generating protein sequence similarity networks. *Biochim. Biophys. Acta.* **1854**, 1019-1037 (2015).
4. Kieser, T., Bibb, M. J., Buttner, M. J., Chater, K. F. & Hopwood, D. A. Practical Streptomyces Genetics (John Innes Foundation, Norwich, UK) (2000).
5. Ye, Q. et al. Construction and co-expression of a polycistronic plasmid encoding carbonylreductase and glucose dehydrogenase for production of ethyl (*S*)-4-chloro-3-hydroxybutanoate. *Bioresour. Technol.* **101**, 6761-6767 (2010).
